# Supplementary material for: Concise synthesis and anti-HIV activity of pyrimido[1,2-c][1,3]benzothiazin-6-imines and related tricyclic heterocycles
Source: Royal Society of Chemistry journal article supplement (doi:10.1039/c2ob25904d), 2012-01-01
Supplement: c2ob25904d.pdf [file c2ob25904d.pdf]

## Supplementary Information

### Concise synthesis and anti-HIV activity of pyrimido[1,2-*c*][1,3]benzothiazin-6-imines and related tricyclic heterocycles

Tsukasa Mizuhara,<sup>a</sup> Shinya Oishi,\*<sup>a</sup> Hiroaki Ohno,<sup>a</sup> Kazuya Shimura,<sup>b</sup> Masao Matsuoka<sup>b</sup>  
and Nobutaka Fujii\*<sup>a</sup>

<sup>a</sup>*Graduate School of Pharmaceutical Sciences, Kyoto University, Sakyo-ku, Kyoto 606-8501, Japan,*

<sup>b</sup>*Institute for Virus Research, Kyoto University, Sakyo-ku, Kyoto 606-8507, Japan*

e-mail: soishi@pharm.kyoto-u.ac.jp (S.O.); nfujii@pharm.kyoto-u.ac.jp (N.F.)

#### Table of Contents

Experimental

section ..... S2

NMR

spectra .....

S32

## Experimental Section

### Synthesis of compound 8

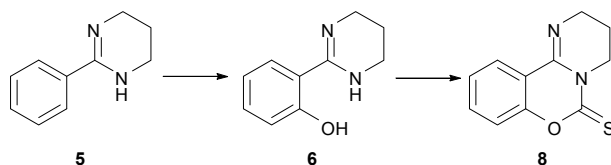

**2-(2-Hydroxyphenyl)tetrahydropyrimidine (6).** DMF (0.83 cm<sup>3</sup>) and water (0.0045 cm<sup>3</sup>, 0.25 mmol) were added to a flask containing **5** (40.1 mg, 0.25 mmol) and Cu(OAc)<sub>2</sub> (45.4 mg, 0.25 mmol) under O<sub>2</sub> atmosphere. After being stirred at 130 °C for 20 min, mixture was concentrated. The residue was purified by flash chromatography over aluminum oxide with CHCl<sub>3</sub>–MeOH (95:5) to give the title compound **6** as brown solid (30.3 mg, 69%): IR (neat)  $\nu_{\max}/\text{cm}^{-1}$ : 3257-3041 (OH), 1613 (C=N);  $\delta_{\text{H}}$  (500 MHz, DMSO-*d*<sub>6</sub>) 1.84-1.88 (2H, m, CH<sub>2</sub>), 3.40 (4H, t, *J* = 5.7 Hz, 2 × CH<sub>2</sub>), 6.27-6.30 (1H, m, Ar), 6.47 (1H, d, *J* = 8.6 Hz, Ar), 7.04-7.08 (1H, m, Ar), 7.45 (1H, dd, *J* = 8.0, 1.7 Hz, Ar), 12.09 (1H, br s).  $\delta_{\text{C}}$  (125 MHz, CD<sub>3</sub>OD) 20.0, 39.3 (2C), 111.2, 114.5, 124.4, 126.3, 135.1, 161.0, 172.4; LRMS (FAB): *m/z* calcd for C<sub>10</sub>H<sub>13</sub>N<sub>2</sub>O [M + H]<sup>+</sup> 177; found: 177.

**3,4-Dihydro-2H,6H-pyrimido[1,2-c][1,3]benzoxazine-6-thione (8).** To a suspension of **6** (33.0 mg, 0.19 mmol) and Et<sub>3</sub>N (0.068 cm<sup>3</sup>, 0.47 mmol) in CH<sub>2</sub>Cl<sub>2</sub> (10.0 cm<sup>3</sup>) was added dropwise a solution of thiophosgene (0.016 cm<sup>3</sup>, 0.21 mmol) in CH<sub>2</sub>Cl<sub>2</sub> (1.0 cm<sup>3</sup>) at 0 °C. After being stirred at room temperature for 1h, the mixture was quenched with sat. NaHCO<sub>3</sub>, and concentrated. The whole was extracted with EtOAc. The extract was washed with sat. NaHCO<sub>3</sub>, brine, and dried over MgSO<sub>4</sub>. After concentration, the residue was purified by flash chromatography over silica gel with *n*-hexane–EtOAc (3:1) to give the title compound **8** as yellow solid (41.9 mg, quant): mp 135–136 °C (from CHCl<sub>3</sub>–*n*-hexane); IR (neat)  $\nu_{\max}/\text{cm}^{-1}$ : 1655 (C=N);  $\delta_{\text{H}}$  (400 MHz, CDCl<sub>3</sub>) 2.03-2.08 (2H, m, CH<sub>2</sub>), 3.68 (2H, t, *J* = 5.5 Hz, CH<sub>2</sub>), 4.30 (2H, t, *J* = 6.1 Hz, CH<sub>2</sub>), 7.21 (1H, d, *J* = 8.5 Hz, Ar), 7.25-7.29 (1H, m, Ar), 7.50-7.52 (1H, m, Ar), 8.00 (1H, d, *J* = 7.8 Hz, Ar).  $\delta_{\text{C}}$  (100 MHz, CDCl<sub>3</sub>) 21.1, 44.5, 49.2, 115.9, 116.9, 125.4, 125.7, 133.0, 139.7, 150.9, 180.8; *Anal.* calcd for C<sub>11</sub>H<sub>10</sub>N<sub>2</sub>OS: C, 60.53; H, 4.62; N, 12.83. Found: C, 60.23; H, 4.72; N, 12.62.

### Synthesis of 3,4-dihydro-2H,6H-pyrimido[1,2-c][1,3]benzoxazin-6-imine (9)

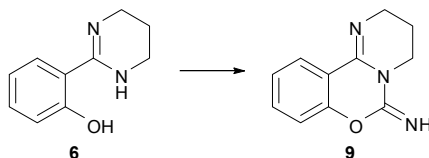

Compound **6** (5.4 mg, 0.03 mmol) was suspended with CH<sub>2</sub>Cl<sub>2</sub> (0.3 cm<sup>3</sup>) and added the solution of BrCN (3.3 mg, 0.06 mmol) in CH<sub>2</sub>Cl<sub>2</sub> (0.3 cm<sup>3</sup>). After being stirred for 1h at room temperature, the additional portion of BrCN (3.3 mg, 0.06 mmol) in CH<sub>2</sub>Cl<sub>2</sub> (0.3 cm<sup>3</sup>) was added. After being stirred for 1 h at room temperature, the mixture was concentrated. The residue was purified by preparative TLC over NH<sub>2</sub> silica gel with *n*-hexane–EtOAc (1:1) to give the title compound **9** as colorless solid (2.1 mg, 34%): mp 104–105 °C (from CHCl<sub>3</sub>–*n*-hexane); IR (neat)  $\nu_{\max}/\text{cm}^{-1}$ : 1639 (C=N), 1611 (C=N);  $\delta_{\text{H}}$  (500 MHz,

CDCl<sub>3</sub>) 1.98-2.03 (2H, m, CH<sub>2</sub>), 3.64 (2H, t, *J* = 5.4 Hz, CH<sub>2</sub>), 3.93 (2H, t, *J* = 6.0 Hz, CH<sub>2</sub>), 5.83 (1H, br s, NH), 6.99 (1H, d, *J* = 8.0 Hz, Ar), 7.15 (1H, t, *J* = 8.0 Hz, Ar), 7.42 (1H, td, *J* = 8.0, 1.7 Hz, Ar), 7.99 (1H, dd, *J* = 8.0, 1.7 Hz, Ar). δ<sub>C</sub> (125 MHz, CDCl<sub>3</sub>) 20.6, 43.4, 44.1, 115.2, 116.2, 123.9, 125.5, 132.3, 142.5, 150.4, 150.7; *Anal.* calcd for C<sub>11</sub>H<sub>11</sub>N<sub>3</sub>O: C, 65.66; H, 5.51; N, 20.88. Found: C, 65.55; H, 5.40; N, 20.70.

### Synthesis of 3,4-dihydro-2*H*,6*H*-pyrimido[1,2-*c*]quinazolin-6(7*H*)-thione (11)

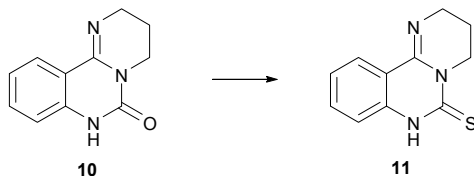

Xylene (4.0 mL) was added to a flask containing **10** (50.3 mg, 0.25 mmol), Lawesson's reagent (202.2 mg, 0.50 mmol). After being stirred under reflux for 24 h, xylene (2 cm<sup>3</sup>) and additional amount of Lawesson's reagent (101.1 mg, 0.25 mmol) was added. After being stirred under reflux for additional 12 h, the mixture was cooled to room temperature. The residue was dissolved in CHCl<sub>3</sub> and washed with sat. NaHCO<sub>3</sub> and brine and dried over MgSO<sub>4</sub>. After concentration, the residue was purified by flash chromatography over silica gel with *n*-hexane–EtOAc (2:1) to give the title compound **11** as colorless solid (10.4 mg, 19%): mp 258–259 °C (from CHCl<sub>3</sub>–*n*-hexane); IR (neat) ν<sub>max</sub>/cm<sup>-1</sup>: 1618 (C=N); δ<sub>H</sub> (500 MHz, DMSO-*d*<sub>6</sub>) 1.85-1.90 (2H, m, CH<sub>2</sub>), 3.52 (2H, t, *J* = 5.4 Hz, CH<sub>2</sub>), 4.19 (2H, t, *J* = 6.0 Hz, CH<sub>2</sub>), 7.12-7.19 (2H, m, Ar), 7.46 (1H, t, *J* = 7.7 Hz, Ar), 7.92 (1H, d, *J* = 6.9 Hz, Ar), 12.00 (1H, s, NH). δ<sub>C</sub> (100 MHz, DMSO-*d*<sub>6</sub>) 20.6, 44.0, 46.7, 114.8, 117.6, 123.8, 125.1, 132.1, 135.9, 142.1, 174.0; HRMS (FAB): *m/z* calcd for C<sub>11</sub>H<sub>12</sub>N<sub>3</sub>S [M + H]<sup>+</sup> 218.0752; found: 218.0757.

### Synthesis of compound 12

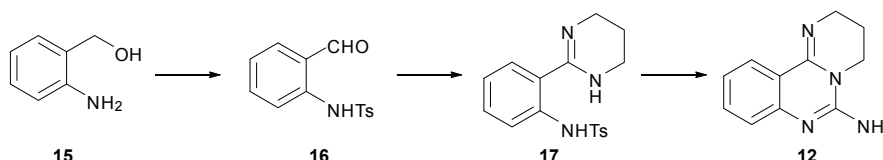

**2-[*N*-(*p*-Toluenesulfonyl)amino]benzaldehyde (16).** To a solution of **15** (2.0 g, 16.2 mmol) and pyridine (1.6 cm<sup>3</sup>, 19.4 mmol) in CHCl<sub>3</sub> (60 cm<sup>3</sup>) was added a solution of *p*-TsCl (3.4 g, 18.0 mmol) in CHCl<sub>3</sub> (17 cm<sup>3</sup>), and the mixture was stirred at rt for 3 h. After concentration, EtOAc and sat. NH<sub>4</sub>Cl was added to the residue. The organic phase was separated and dried over MgSO<sub>4</sub>. After concentration, the resulting solid was added to a suspension of PCC (5.2 g, 24.3 mmol) and silica gel (10.6 g) in CHCl<sub>3</sub> (70 cm<sup>3</sup>). After being stirred at rt for 2 h, the mixture was filtered and concentrated. The residue was purified by flash chromatography over silica gel with *n*-hexane–EtOAc (9:1) to give the title compound **16** as colorless solid (3.6 g, 80%): mp 134–136 °C (from CHCl<sub>3</sub>–*n*-hexane); IR (neat) ν<sub>max</sub>/cm<sup>-1</sup>: 1672 (C=O), 1492 (NSO<sub>2</sub>), 1157 (NSO<sub>2</sub>); δ<sub>H</sub> (400 MHz, CDCl<sub>3</sub>) 2.36 (3H, s, CH<sub>3</sub>), 7.16 (1H, t, *J* = 7.6 Hz, Ar), 7.24 (2H, d, *J* = 8.5 Hz, Ar), 7.49-7.53 (1H, m, Ar), 7.59 (1H, dd, *J* = 7.6, 1.5 Hz, Ar), 7.69 (1H, d, *J* = 8.3 Hz, Ar), 7.77 (2H, d, *J* = 8.5 Hz, Ar), 9.83 (1H, s, CHO), 10.78 (1H, br s, NH). δ<sub>C</sub> (100 MHz, CDCl<sub>3</sub>) 21.5, 117.8, 121.9, 122.9, 127.3 (2C), 129.7 (2C), 135.8, 136.1, 136.5, 140.0, 144.1, 194.9; *Anal.* calcd for

C<sub>14</sub>H<sub>13</sub>NO<sub>3</sub>S: C, 61.07; H, 4.76; N, 5.09. Found: C, 60.97; H, 4.46; N, 5.05.

**2-[2-*N*-(*p*-Toluenesulfonylamino)phenyl]-1,4,5,6-tetrahydropyrimidine (17).** To a solution of **16** (2.75 g, 10 mmol) in *t*-BuOH (94 cm<sup>3</sup>) was added propylenediamine (969 mg, 11 mmol). The mixture was stirred at 70 °C for 30 min, and then K<sub>2</sub>CO<sub>3</sub> (4.15 g, 30 mmol) and I<sub>2</sub> (3.17 g, 12.5 mmol) were added. After being stirred at same temperature for 3 h, the mixture was quenched with sat. Na<sub>2</sub>SO<sub>3</sub> until the iodine color disappeared. The organic layer was separated and concentrated. The resulting solid was dissolved in H<sub>2</sub>O. The whole was extracted with CHCl<sub>3</sub>, and dried over MgSO<sub>4</sub>. After concentration, the resulting solid was recrystallized from CHCl<sub>3</sub>-Et<sub>2</sub>O-*n*-hexane to give the title compound **17** as pale yellow crystals (3.23 g, 98%): mp 211–213 °C; IR (neat)  $\nu_{\max}/\text{cm}^{-1}$ : 1630 (C=N); 1478 (NSO<sub>2</sub>), 1124 (NSO<sub>2</sub>);  $\delta_{\text{H}}$  (400 MHz, CDCl<sub>3</sub>) 1.77-1.82 (2H, m, CH<sub>2</sub>), 2.34 (3H, s, CH<sub>3</sub>), 3.36 (4H, t,  $J = 5.7$  Hz, 2 × CH<sub>2</sub>), 6.53-6.57 (1H, m, Ar), 7.04-7.08 (1H, m, Ar), 7.16-7.22 (3H, m, Ar), 7.58 (1H, dd,  $J = 8.2, 1.3$  Hz, Ar), 7.76 (2H, d,  $J = 8.3$  Hz, Ar), 10.75 (1H, br s, NH).  $\delta_{\text{C}}$  (100 MHz, CDCl<sub>3</sub>) 18.4, 21.3, 38.8 (2C), 112.4, 117.7, 121.2, 126.3 (2C), 126.5, 129.2 (2C), 133.0, 140.9, 142.0, 150.3, 158.9; HRMS (FAB):  $m/z$  calcd for C<sub>17</sub>H<sub>20</sub>N<sub>3</sub>O<sub>2</sub>S [M + H]<sup>+</sup> 330.1276; found: 330.1273.

**3,4-Dihydro-2*H*,6*H*-pyrimido[1,2-*c*]quinazolin-6-amine (12).** To a flask containing **17** (164.7 mg, 0.5 mmol) was added conc. H<sub>2</sub>SO<sub>4</sub> (5.0 cm<sup>3</sup>). After being stirred at 100 °C for 30 min, the mixture was cooled to 0 °C, and then pH was adjusted to 12-14 with 2N NaOH. The whole was extracted with CHCl<sub>3</sub>, and dried over MgSO<sub>4</sub>. After concentration, the residue was dissolved in anhydrous EtOH (2 cm<sup>3</sup>). Then, BrCN (105.9 mg, 1.0 mmol) was added to the mixture under Ar atmosphere. After being stirred under reflux for 2 h, the reaction was quenched with 2N NaOH. The whole was extracted with CHCl<sub>3</sub>, and dried over MgSO<sub>4</sub>. After concentration, the residue was purified by flash chromatography over aluminum oxide with EtOAc-MeOH (95:5) to give the title compound **12** as colorless solid (66.0 mg, 66%): mp 259–260 °C (from CHCl<sub>3</sub>-*n*-hexane); IR (neat)  $\nu_{\max}/\text{cm}^{-1}$ : 1620 (C=N), 1603 (C=N);  $\delta_{\text{H}}$  (400 MHz, DMSO-*d*<sub>6</sub>) 1.81-1.87 (2H, m, CH<sub>2</sub>), 3.44 (2H, t,  $J = 5.4$  Hz, CH<sub>2</sub>), 3.70 (2H, t,  $J = 6.1$  Hz, CH<sub>2</sub>), 6.49 (2H, br s, NH<sub>2</sub>), 6.87-6.95 (2H, m, Ar), 7.27-7.31 (1H, m, Ar), 7.87 (1H, dd,  $J = 7.9, 1.1$  Hz, Ar).  $\delta_{\text{C}}$  (100 MHz, DMSO-*d*<sub>6</sub>) 20.0, 42.8, 42.9, 118.9, 120.7, 122.7, 124.3, 131.1, 145.6, 146.6, 151.6; HRMS (FAB):  $m/z$  calcd for C<sub>11</sub>H<sub>13</sub>N<sub>4</sub> [M + H]<sup>+</sup> 201.1140; found: 201.1138.

### Synthesis of 3,4-dihydro-2*H*,6*H*-pyrimido[1,2-*c*][1,3]benzthiazine-6-thione (13) via C-H functionalization

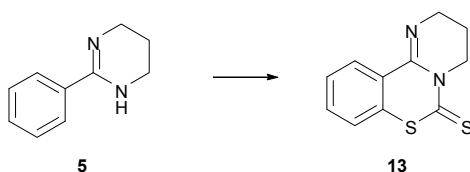

To a solution of **5** (40.1 mg, 0.25 mmol), Cu(OAc)<sub>2</sub> (45.4 mg, 0.25 mmol) in 1,4-dioxane (0.83 cm<sup>3</sup>) was added CS<sub>2</sub> (0.045 cm<sup>3</sup>, 0.75 mmol) under O<sub>2</sub> atmosphere. After being stirred at 130 °C for 15 min, the mixture was concentrated. The residue was purified by flash chromatography over silica gel with *n*-hexane-EtOAc (9:1) to give the title compound **13** as pale yellow solid (6.6 mg, 11%). Spectral data

were in good agreement with those previously reported.<sup>2</sup>

### Synthesis of 3,4-dihydro-2*H*,6*H*-pyrimido[1,2-*c*][1,3]benzothiazin-6-one (14).

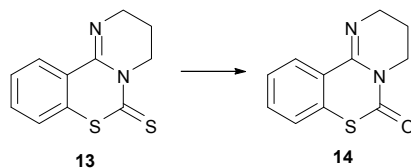

Compound **13** (58.6 mg, 0.25 mmol) was suspended into a 0.1M NaOH in MeOH-H<sub>2</sub>O (9:1, 5 cm<sup>3</sup>). After being stirred under reflux for 12 h, the mixture was concentrated. To a stirring solution of the residue and Et<sub>3</sub>N (0.029 cm<sup>3</sup>, 2.0 mmol) in CH<sub>2</sub>Cl<sub>2</sub> (16.6 cm<sup>3</sup>) was added dropwise a solution of triphosgene (155.8 mg, 0.52 mmol) in CH<sub>2</sub>Cl<sub>2</sub> (1.7 cm<sup>3</sup>) at 0 °C. After being stirred at room temperature for 1 h, the mixture was quenched with sat. NaHCO<sub>3</sub>. The whole was extracted with CHCl<sub>3</sub>. The extract was washed with sat. NaHCO<sub>3</sub>, brine, and dried over MgSO<sub>4</sub>. After concentration, the residue was purified by flash chromatography over silica gel with *n*-hexane–EtOAc (9:1) to give the title compound **14** as colorless solid (35.3 mg, 65%): mp 102–103 °C (from CHCl<sub>3</sub>–*n*-hexane); IR (neat)  $\nu_{\max}$ /cm<sup>-1</sup>: 1639 (C=O) 1612 (C=N);  $\delta_{\text{H}}$  (500 MHz, CDCl<sub>3</sub>) 1.95-1.99 (2H, m, CH<sub>2</sub>), 3.73 (2H, t, *J* = 5.7 Hz, CH<sub>2</sub>), 4.00 (2H, t, *J* = 6.0 Hz, CH<sub>2</sub>), 7.13 (1H, dd, *J* = 8.0, 1.3 Hz, Ar), 7.27-7.30 (1H, m, Ar), 7.40 (1H, td, *J* = 8.0, 1.1 Hz, Ar), 8.28 (1H, dd, *J* = 8.0, 1.1 Hz, Ar).  $\delta_{\text{C}}$  (125 MHz, CDCl<sub>3</sub>) 20.8, 42.4, 45.2, 124.4, 125.8, 126.8, 128.9, 129.2, 130.9, 146.1, 162.8; HRMS (FAB): *m/z* calcd for C<sub>11</sub>H<sub>11</sub>N<sub>2</sub>OS [M + H]<sup>+</sup> 219.0592; found: 219.0592.

### Synthesis of compound 28a

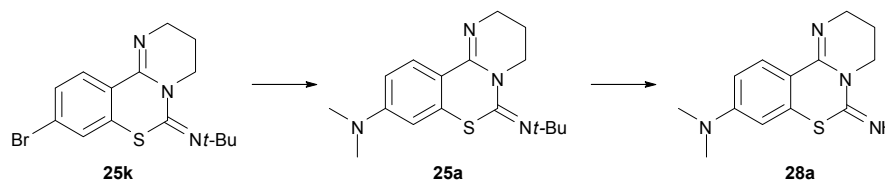

***N*-(*tert*-Butyl)-9-(*N,N*-dimethylamino)-3,4-dihydro-2*H*,6*H*-pyrimido[1,2-*c*][1,3]benzothiazin-6-imine (25a)**. To a mixture of **25k** (88.1 mg, 0.25 mmol) and Pd(OAc)<sub>2</sub> (5.6 mg, 0.025 mmol) and KO*t*-Bu (84.2 mg, 0.75 mmol) in toluene (2.0 cm<sup>3</sup>) were added P(*tert*-Bu)<sub>3</sub> (0.009 cm<sup>3</sup>, 0.038 mmol) and 2*N* Me<sub>2</sub>NH in THF (0.38 cm<sup>3</sup>, 0.75 mmol). After being stirred at reflux for 1 h, the mixture was filtered through a celite pad and concentrated. The residue was purified by flash chromatography over aluminum oxide with *n*-hexane–EtOAc (7:3) to give the title compound **25a** as colorless solid (80.9 mg, quant): mp 161–162 °C (from CHCl<sub>3</sub>–*n*-hexane); IR (neat)  $\nu_{\max}$ /cm<sup>-1</sup>: 1587 (C=N);  $\delta_{\text{H}}$  (400 MHz, CDCl<sub>3</sub>) 1.38 (9H, s, 3 × CH<sub>3</sub>), 1.86-1.92 (2H, m, CH<sub>2</sub>), 2.97 (6H, s, 2 × CH<sub>3</sub>), 3.58 (2H, t, *J* = 5.5 Hz, CH<sub>2</sub>), 3.85 (2H, t, *J* = 6.1 Hz, CH<sub>2</sub>), 6.28 (1H, d, *J* = 2.7 Hz, Ar), 6.55 (1H, dd, *J* = 9.0, 2.7 Hz, Ar), 8.04 (1H, d, *J* = 9.0 Hz, Ar).  $\delta_{\text{C}}$  (100 MHz, CDCl<sub>3</sub>) 22.0, 30.0 (3C), 40.0 (2C), 44.9, 45.5, 54.0, 105.5, 110.6, 115.7, 129.7, 130.0, 139.2, 148.0, 151.2; HRMS (FAB): *m/z* calcd for C<sub>17</sub>H<sub>25</sub>N<sub>4</sub>S [M + H]<sup>+</sup> 317.1800; found: 317.1803.

**9-(*N,N*-Dimethylamino)-3,4-dihydro-2*H*,6*H*-pyrimido[1,2-*c*][1,3]benzothiazin-6-imine (28a)**. TFA (2.0 cm<sup>3</sup>) was added to a mixture of **25a** (63.3 mg, 0.2 mmol) in small amount of CHCl<sub>3</sub> and MS4Å (300

mg, powder, activated by heating with Bunsen burner). After being stirred under reflux for 1 h, the mixture was concentrated. To a stirring mixture of the residue in  $\text{CHCl}_3$  was added dropwise  $\text{Et}_3\text{N}$  at  $0^\circ\text{C}$  to adjust pH to 8–9. The whole was extracted with  $\text{EtOAc}$ . The extract was washed with sat.  $\text{NaHCO}_3$ , brine, and dried over  $\text{MgSO}_4$ . After concentration, the residue was purified by flash chromatography over aluminum oxide with *n*-hexane– $\text{EtOAc}$  (7:3) to give the title compound **28a** as colorless solid (38.2 mg, 73%): mp  $150\text{--}151^\circ\text{C}$  (from  $\text{CHCl}_3$ –*n*-hexane); IR (neat)  $\nu_{\text{max}}/\text{cm}^{-1}$ : 1600 (C=N), 1562 (C=N);  $\delta_{\text{H}}$  (500 MHz,  $\text{CDCl}_3$ ) 1.93–1.98 (2H, m,  $\text{CH}_2$ ), 2.98 (6H, s,  $2 \times \text{CH}_3$ ), 3.64 (2H, t,  $J = 5.7$  Hz,  $\text{CH}_2$ ), 4.00 (2H, t,  $J = 6.3$  Hz,  $\text{CH}_2$ ), 6.17 (1H, d,  $J = 2.3$  Hz, Ar), 6.55 (1H, dd,  $J = 9.2, 2.3$  Hz, Ar), 7.01 (1H, br s, NH), 8.05 (1H, d,  $J = 9.2$  Hz, Ar).  $\delta_{\text{C}}$  (125 MHz,  $\text{CDCl}_3$ ) 21.1, 40.0 (2C), 43.8, 44.7, 104.4, 110.7, 114.4, 129.8, 129.9, 146.7, 151.3, 154.2; HRMS (FAB):  $m/z$  calcd for  $\text{C}_{13}\text{H}_{17}\text{N}_4\text{S}$   $[\text{M} + \text{H}]^+$  261.1174; found: 261.1173.

### Synthesis of compound **28b**

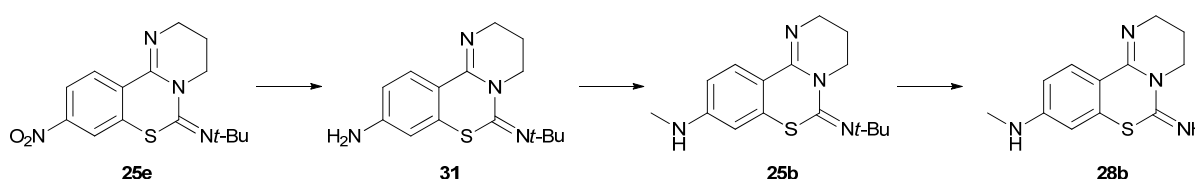

**9-Amino-*N*-(*tert*-butyl)-3,4-dihydro-2*H*,6*H*-pyrimido[1,2-*c*][1,3]benzothiazin-6-imine (31).** To a suspension of **25e** (477.0 mg, 1.5 mmol) in  $\text{EtOH}$  ( $10\text{ cm}^3$ ) was added 10% Pd-C (ca. 55% in water, 400 mg) under a  $\text{H}_2$  atmosphere. After being stirred at room temperature overnight, the mixture was filtered through a celite pad. After concentration, the resulting solid was recrystallized from  $\text{CHCl}_3$ –*n*-hexane to give the title compound **31** as colorless crystals (381.1 mg, 88%): mp  $152\text{--}155^\circ\text{C}$ ; IR (neat)  $\nu_{\text{max}}/\text{cm}^{-1}$ : 1589 (C=N);  $\delta_{\text{H}}$  (400 MHz,  $\text{CDCl}_3$ ) 1.37 (9H, s,  $3 \times \text{CH}_3$ ), 1.86–1.92 (2H, m,  $\text{CH}_2$ ), 3.57 (2H, t,  $J = 5.4$  Hz,  $\text{CH}_2$ ), 3.84 (2H, t,  $J = 6.0$  Hz,  $\text{CH}_2$ ), 3.88 (2H, br s,  $\text{NH}_2$ ), 6.33 (1H, d,  $J = 2.2$  Hz, Ar), 6.49 (1H, dd,  $J = 8.5, 2.2$  Hz, Ar), 7.99 (1H, d,  $J = 8.5$  Hz, Ar).  $\delta_{\text{C}}$  (100 MHz,  $\text{CD}_3\text{OD}$ ) 22.7, 30.2 (3C), 45.2, 46.8, 55.2, 109.1, 114.4, 116.4, 130.7, 131.4, 140.5, 151.8, 152.4; HRMS (FAB):  $m/z$  calcd for  $\text{C}_{15}\text{H}_{21}\text{N}_4\text{S}$   $[\text{M} + \text{H}]^+$  289.1487; found: 289.1489.

***N*-(*tert*-Butyl)-3,4-dihydro-9-(*N*-methylamino)-2*H*,6*H*-pyrimido[1,2-*c*][1,3]benzothiazin-6-imine (25b).** To a flask containing **31** (108.5 mg, 0.38 mmol),  $\text{MeONa}$  (30.6 mg, 0.57 mmol), and paraformaldehyde (34.2 mg, 1.1 mmol) was added dehydrate  $\text{MeOH}$  ( $2.5\text{ cm}^3$ ) under an Ar atmosphere, and the reaction was continued for 5 h under reflux. Then,  $\text{NaBH}_4$  (28.8 mg, 0.76 mmol) was added to the mixture and the reaction was continued for additional 30 min under reflux. After concentration, the residue was dissolved in  $\text{AcOEt}$ , and washed with sat.  $\text{NaHCO}_3$ , brine, and dried over  $\text{MgSO}_4$ . After concentration, the residue was purified by flash column chromatography over aluminum oxide with *n*-hexane– $\text{EtOAc}$  (1:1) to give the title compound **25b** as yellow solid (104.9 mg, 91%): mp  $156\text{--}158^\circ\text{C}$  (from  $\text{CHCl}_3$ –*n*-hexane); IR (neat)  $\nu_{\text{max}}/\text{cm}^{-1}$ : 1590 (C=N);  $\delta_{\text{H}}$  (400 MHz,  $\text{CDCl}_3$ ) 1.38 (9H, s,  $3 \times \text{CH}_3$ ), 1.87–1.92 (2H, m,  $\text{CH}_2$ ), 2.83 (3H, s,  $\text{CH}_3$ ), 3.57 (2H, t,  $J = 5.4$  Hz,  $\text{CH}_2$ ), 3.85 (2H, t,  $J = 6.0$  Hz,  $\text{CH}_2$ ), 4.04 (1H, br s, NH), 6.20 (1H, d,  $J = 2.4$  Hz, Ar), 6.43 (1H, dd,  $J = 8.8, 2.4$  Hz, Ar), 8.01 (1H, d,  $J = 8.8$  Hz, Ar).  $\delta_{\text{C}}$  (100 MHz,  $\text{CDCl}_3$ ) 21.9, 30.0 (3C), 30.2, 44.7, 45.5, 54.0, 104.9, 111.8, 116.3, 129.7, 130.4, 139.0, 148.3, 150.6.; HRMS (FAB):  $m/z$  calcd for  $\text{C}_{16}\text{H}_{23}\text{N}_4\text{S}$   $[\text{M} + \text{H}]^+$  303.1643; found: 303.1638.



**3,4-Dihydro-9-(*N*-methylamino)-2*H*,6*H*-pyrimido[1,2-*c*][1,3]benzothiazin-6-imine (28b).** Using the general procedure as described for **28a**, compound **25b** (30.7 mg, 0.1 mmol) was allowed to react for 1 h with TFA (1.0 cm<sup>3</sup>) and MS4Å (200 mg). Purification by flash chromatography over aluminum oxide with *n*-hexane–EtOAc (1:1 to 0:10) gave the title compound **28b** as pale yellow solid (9.0 mg, 37%): mp 129–131 °C (from CHCl<sub>3</sub>–*n*-hexane); IR (neat)  $\nu_{\max}/\text{cm}^{-1}$ : 1602 (C=N), 1555 (C=N);  $\delta_{\text{H}}$  (400 MHz, CDCl<sub>3</sub>) 1.92–1.98 (2H, m, CH<sub>2</sub>), 2.84 (3H, d,  $J = 4.1$  Hz, CH<sub>3</sub>), 3.64 (2H, t,  $J = 5.6$  Hz, CH<sub>2</sub>), 4.00 (2H, t,  $J = 6.2$  Hz, CH<sub>2</sub>), 4.03 (1H, br s, NH), 6.11 (1H, d,  $J = 2.4$  Hz, Ar), 6.44 (1H, dd,  $J = 8.8, 2.4$  Hz, Ar), 8.01 (1H, d,  $J = 8.8$  Hz, Ar).  $\delta_{\text{C}}$  (100 MHz, CDCl<sub>3</sub>) 21.1, 30.2, 43.9, 44.6, 104.0, 111.9, 129.2, 130.1, 130.3, 146.9, 150.8, 154.1; *Anal.* calcd for C<sub>12</sub>H<sub>14</sub>N<sub>4</sub>S: C, 58.51; H, 5.73; N, 22.74. Found: C, 58.30; H, 5.62; N, 22.45.

### Synthesis of compound 28c

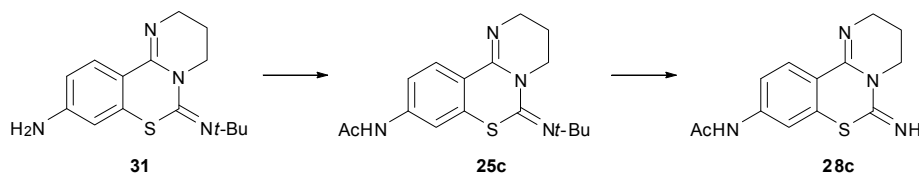

**9-(*N*-Acethylamino)-*N*-(*tert*-butyl)-3,4-dihydro-2*H*,6*H*-pyrimido[1,2-*c*][1,3]benzothiazin-6-imine (25c).** To a mixture of **31** (100.9 mg, 0.35 mmol), Et<sub>3</sub>N (0.015 cm<sup>3</sup>, 1.05 mmol), DMAP (4.3 mg, 0.04 mmol) in CH<sub>2</sub>Cl<sub>2</sub> (3.5 cm<sup>3</sup>) was added Ac<sub>2</sub>O (0.066 cm<sup>3</sup>, 0.70 mmol) under an Ar atmosphere. After being stirred under reflux for 1 h, the mixture was added sat. NaHCO<sub>3</sub>. The whole was extracted with AcOEt. The extract was washed with brine, and dried over MgSO<sub>4</sub>. After concentration, the residue was purified by flash chromatography over aluminum oxide with *n*-hexane–EtOAc (1:1 to 0:10) to give the title compound **25c** as colorless solid (120.1 mg, quant): mp 213–214 °C (from CHCl<sub>3</sub>–*n*-hexane); IR (neat)  $\nu_{\max}/\text{cm}^{-1}$ : 1680 (C=O), 1596 (C=N);  $\delta_{\text{H}}$  (400 MHz, CDCl<sub>3</sub>) 1.37 (9H, s, 3 × CH<sub>3</sub>), 1.88–1.93 (2H, m, CH<sub>2</sub>), 2.15 (3H, s, CH<sub>3</sub>), 3.59 (2H, t,  $J = 5.4$  Hz, CH<sub>2</sub>), 3.86 (2H, t,  $J = 6.1$  Hz, CH<sub>2</sub>), 6.99 (1H, dd,  $J = 8.7, 2.1$  Hz, Ar), 7.74 (1H, d,  $J = 2.1$  Hz, Ar), 7.96 (1H, br s, NH), 8.08 (1H, d,  $J = 8.7$  Hz, Ar).  $\delta_{\text{C}}$  (100 MHz, CDCl<sub>3</sub>) 21.8, 24.6, 29.9 (3C), 44.9, 45.4, 54.2, 114.4, 116.8, 123.1, 129.1, 130.4, 138.2, 139.7, 147.8, 168.6; HRMS (FAB):  $m/z$  calcd for C<sub>17</sub>H<sub>23</sub>N<sub>4</sub>OS [M + H]<sup>+</sup> 331.1593; found: 331.1590.

**9-(*N*-Acethylamino)-3,4-dihydro-2*H*,6*H*-pyrimido[1,2-*c*][1,3]benzothiazin-6-imine (28c).** Using the general procedure as described for **28a**, compound **25c** (120.1 mg, 0.36 mmol) was allowed to react for 10 h. Purification by recrystallization from MeOH–CHCl<sub>3</sub>–Et<sub>2</sub>O gave the title compound **28c** as pale yellow crystals (64.9 mg, 65%): mp 214 °C (decomp.); IR (neat)  $\nu_{\max}/\text{cm}^{-1}$ : 1681 (C=O), 1619 (C=N), 1550 (C=N);  $\delta_{\text{H}}$  (400 MHz, DMSO-*d*<sub>6</sub>) 1.85–1.91 (2H, m, CH<sub>2</sub>), 2.07 (3H, s, CH<sub>3</sub>), 3.55 (2H, t,  $J = 5.5$  Hz, CH<sub>2</sub>), 3.92 (2H, t,  $J = 6.0$  Hz, CH<sub>2</sub>), 7.32 (1H, dd,  $J = 8.9, 1.8$  Hz, Ar), 7.61 (1H, d,  $J = 1.8$  Hz, Ar), 8.10 (1H, d,  $J = 8.9$  Hz, Ar), 9.14 (1H, br s, NH), 10.27 (1H, s, NH).  $\delta_{\text{C}}$  (100 MHz, DMSO-*d*<sub>6</sub>) 20.3, 24.1, 43.3, 43.6, 112.2, 116.7, 119.3, 129.2, 129.9, 141.7, 146.3, 149.5, 169.0; HRMS (FAB):  $m/z$  calcd for C<sub>13</sub>H<sub>15</sub>N<sub>4</sub>OS [M + H]<sup>+</sup> 275.0967; found: 275.0967.

### Synthesis of 9-acetyl-3,4-dihydro-2H,6H-pyrimido[1,2-c][1,3]benzothiazin-6-imine (28d).

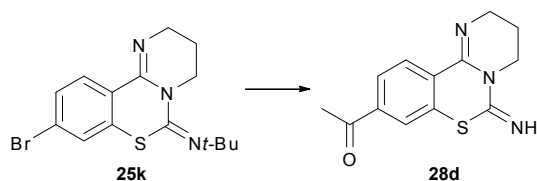

To a mixture of **25k** (100 mg, 0.284 mmol), Pd(OAc)<sub>2</sub> (6.4 mg, 0.0284 mmol), K<sub>2</sub>CO<sub>3</sub> (120 mg, 0.852 mmol) and dppp (23.7 mg, 0.0568 mmol) in H<sub>2</sub>O (0.57 cm<sup>3</sup>) was added ethylene glycol monovinyl ether (0.13 cm<sup>3</sup>, 1.42 mmol). After being stirred at reflux for 12 h, the whole was extracted with CHCl<sub>3</sub>. The extract was washed with brine, and dried over Na<sub>2</sub>SO<sub>4</sub>. After concentration, TFA (2.84 cm<sup>3</sup>) was added to resulting residue. After being stirred under reflux for 1.5 h, the mixture was added dropwise to Et<sub>3</sub>N at 0 °C to adjust pH to 8–9. The whole was extracted with EtOAc. The extract was washed with brine, and dried over Na<sub>2</sub>SO<sub>4</sub>. After concentration, the residue was purified by preparative TLC over aluminium oxide with *n*-hexane–EtOAc (7:3) to give the title compound **28d** as pale yellow solid (9.7 mg, 13.1%): mp 148.4 °C; IR (neat)  $\nu_{\max}/\text{cm}^{-1}$ : 1678 (C=O), 1616 (C=N), 1567 (C=N);  $\delta_{\text{H}}$  (300 MHz, CDCl<sub>3</sub>) 1.95–2.03 (2H, m, CH<sub>2</sub>), 2.60 (3H, s, CH<sub>3</sub>), 3.72 (2H, t, *J* = 5.7 Hz, CH<sub>2</sub>), 4.03 (2H, t, *J* = 6.3 Hz, CH<sub>2</sub>), 7.63 (1H, d, *J* = 1.8 Hz, Ar), 7.74 (1H, dd, *J* = 8.3, 1.7 Hz, Ar), 8.32 (1H, d, *J* = 7.8 Hz, Ar).  $\delta_{\text{C}}$  (75 MHz, CDCl<sub>3</sub>) 20.9, 26.7, 43.8, 45.1, 123.6, 125.7, 129.3, 129.6, 130.4, 138.3, 146.0, 152.6, 196.7; *Anal.* calcd for C<sub>13</sub>H<sub>13</sub>N<sub>3</sub>OS: C, 60.21; H, 5.05; N, 16.20. Found: C, 60.16; H, 5.02; N, 15.94.

### Synthesis of compound 28e

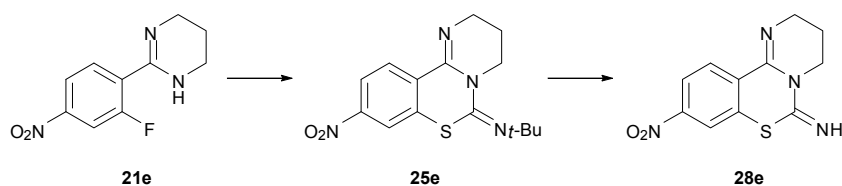

*N*-(*tert*-Butyl)-3,4-dihydro-9-nitro-2H,6H-pyrimido[1,2-c][1,3]benzothiazin-6-imine (**25e**). To a mixture of **21e** (2.0 g, 9.0 mmol) and NaH (716.8 mg, 17.9 mmol; 60% oil suspension) in DMF (29.8 cm<sup>3</sup>) was added *tert*-butylisothiocyanate (2.28 cm<sup>3</sup>, 17.9 mmol) under an Ar atmosphere, and the mixture was stirred at -20 °C to rt for 2 days. The whole was extracted with EtOAc, and the extract was washed with sat. NaHCO<sub>3</sub>, brine, and dried over Na<sub>2</sub>SO<sub>4</sub>. After concentration, the residue was purified by flash chromatography over aluminum oxide with *n*-hexane–EtOAc (10:0 to 9:1) to give the title compound **25e** as pale yellow solid (1.77 g, 62%): mp 152–153 °C (from CHCl<sub>3</sub>–*n*-hexane); IR (neat)  $\nu_{\max}/\text{cm}^{-1}$ : 1591 (NO<sub>2</sub>), 1581 (C=N), 1523 (NO<sub>2</sub>);  $\delta_{\text{H}}$  (500 MHz, CDCl<sub>3</sub>) 1.39 (9H, s, 3 × CH<sub>3</sub>), 1.91–1.96 (2H, m, CH<sub>2</sub>), 3.66 (2H, t, *J* = 5.2 Hz, CH<sub>2</sub>), 3.88 (2H, t, *J* = 5.7 Hz, CH<sub>2</sub>), 7.97 (1H, dd, *J* = 9.7, 2.3 Hz, Ar), 8.01 (1H, d, *J* = 2.3 Hz, Ar), 8.39 (1H, d, *J* = 9.2 Hz, Ar).  $\delta_{\text{C}}$  (125 MHz, CDCl<sub>3</sub>) 21.7, 30.0 (3C), 45.3, 45.5, 54.5, 119.9, 120.3, 130.0, 131.1, 132.8, 136.1, 146.5, 148.5; HRMS (FAB): *m/z* calcd for C<sub>15</sub>H<sub>19</sub>N<sub>4</sub>O<sub>2</sub>S [M + H]<sup>+</sup> 319.1229; found: 319.1229.

**3,4-Dihydro-9-nitro-2H,6H-pyrimido[1,2-c][1,3]benzothiazin-6-imine (28e)**. Using the general procedure as described for **28a**, compound **25e** (47.8 mg, 0.15 mmol) was allowed to react for 1 h with TFA (1.5 cm<sup>3</sup>) and MS4Å (225 mg). Purification by flash chromatography over aluminum oxide with



*n*-hexane–EtOAc (19:1 to 1:1) gave the title compound **28e** as pale yellow solid (24.9 mg, 63%): mp 170–172 °C (from CHCl<sub>3</sub>–*n*-hexane); IR (neat)  $\nu_{\max}/\text{cm}^{-1}$ : 1620 (C=N), 1587 (NO<sub>2</sub>), 1568 (C=N), 1523 (NO<sub>2</sub>);  $\delta_{\text{H}}$  (400 MHz, CDCl<sub>3</sub>) 1.97–2.03 (2H, m, CH<sub>2</sub>), 3.74 (2H, t,  $J = 5.6$  Hz, CH<sub>2</sub>), 4.04 (2H, t,  $J = 6.2$  Hz, CH<sub>2</sub>), 7.41 (1H, br s, NH), 7.93 (1H, d,  $J = 2.2$  Hz, Ar), 8.00 (1H, dd,  $J = 9.0, 2.2$  Hz, Ar), 8.42 (1H, d,  $J = 9.0$  Hz, Ar).  $\delta_{\text{C}}$  (100 MHz, CDCl<sub>3</sub>) 20.8, 43.8, 45.2, 118.9, 120.5, 130.4, 130.8, 131.7, 145.1, 148.7, 151.3; *Anal.* calcd for C<sub>11</sub>H<sub>10</sub>N<sub>4</sub>O<sub>2</sub>S: C, 50.37; H, 3.84; N, 21.36. Found: C, 50.29; H, 4.03; N, 21.08.

### **Synthesis of 3,4-dihydro-9-methoxy-2*H*,6*H*-pyrimido[1,2-*c*][1,3]benzothiazin-6-imine (**28f**)**

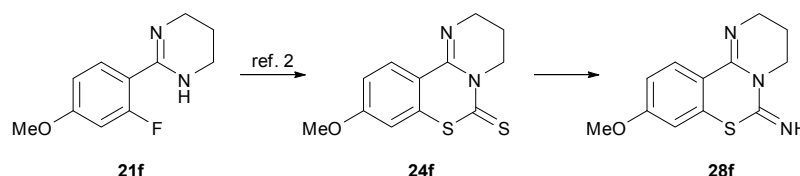

Compound **24f** (66.1 mg, 0.25 mmol) was suspended into a 0.1M solution of NaOH in MeOH–H<sub>2</sub>O (9:1) (5 cm<sup>3</sup>), and the mixture was stirred for 12 h under reflux. After concentration, the residue was suspended in anhydrous EtOH (1 cm<sup>3</sup>). BrCN (53.0 mg, 0.50 mmol) was added under an Ar atmosphere, and the mixture was stirred for 2 h under reflux. The reaction was quenched with 2N NaOH, and the whole was extracted with CHCl<sub>3</sub>, and dried over MgSO<sub>4</sub>. After concentration, the residue was purified by flash chromatography over aluminum oxide with *n*-hexane–EtOAc (9:1) to give the title compound **28f** as colorless solid (37.6 mg, 61%): mp 106 °C (from CHCl<sub>3</sub>–*n*-hexane); IR (neat)  $\nu_{\max}/\text{cm}^{-1}$ : 1620 (C=N), 1572 (C=N);  $\delta_{\text{H}}$  (500 MHz, CDCl<sub>3</sub>) 1.94–1.98 (2H, m, CH<sub>2</sub>), 3.66 (2H, t,  $J = 5.7$  Hz, CH<sub>2</sub>), 3.81 (3H, s, CH<sub>3</sub>), 4.01 (2H, t,  $J = 6.0$  Hz, CH<sub>2</sub>), 6.50 (1H, d,  $J = 2.3$  Hz, Ar), 6.76 (1H, dd,  $J = 9.0, 2.3$  Hz, Ar), 7.15 (1H, br s, NH), 8.15 (1H, d,  $J = 9.0$  Hz, Ar).  $\delta_{\text{C}}$  (125 MHz, CDCl<sub>3</sub>) 21.0, 43.8, 44.8, 55.5, 107.3, 113.3, 119.5, 130.2, 130.6, 146.2, 153.4, 161.2; *Anal.* calcd for C<sub>12</sub>H<sub>13</sub>N<sub>3</sub>OS: C, 58.28; H, 5.30; N, 16.99. Found: C, 58.15; H, 5.23; N, 16.79.

### **Synthesis of 3,4-dihydro-9-methyl-2*H*,6*H*-pyrimido[1,2-*c*][1,3]benzothiazin-6-imine (**28g**)**

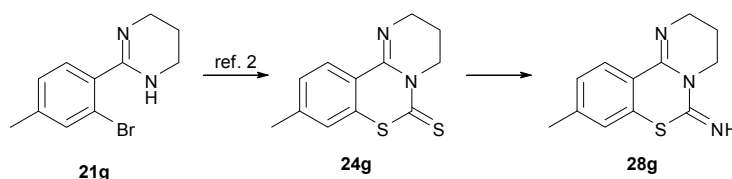

Compound **24g** (62.1 mg, 0.25 mmol) was subjected to general procedure as described for **28f** to give the title compound **28g** as colorless solid (39.2 mg, 68%): mp 121 °C (from CHCl<sub>3</sub>–*n*-hexane); IR (neat)  $\nu_{\max}/\text{cm}^{-1}$ : 1620 (C=N), 1569 (C=N);  $\delta_{\text{H}}$  (500 MHz, CDCl<sub>3</sub>) 1.94–1.99 (2H, m, CH<sub>2</sub>), 2.32 (3H, s, CH<sub>3</sub>), 3.67 (2H, t,  $J = 5.7$  Hz, CH<sub>2</sub>), 4.01 (2H, t,  $J = 6.3$  Hz, CH<sub>2</sub>), 6.84 (1H, s, Ar), 7.02 (1H, d,  $J = 8.6$  Hz, Ar), 7.16 (1H, br s, NH), 8.10 (1H, d,  $J = 8.6$  Hz, Ar).  $\delta_{\text{C}}$  (125 MHz, CDCl<sub>3</sub>) 21.1, 21.1, 43.8, 44.9, 123.6, 124.1, 127.4, 128.6, 128.8, 141.1, 146.6, 153.6; HRMS (FAB):  $m/z$  calcd for C<sub>12</sub>H<sub>14</sub>N<sub>3</sub>S [M + H]<sup>+</sup> 232.0908; found: 232.0912.

### **Synthesis of compound 28h**

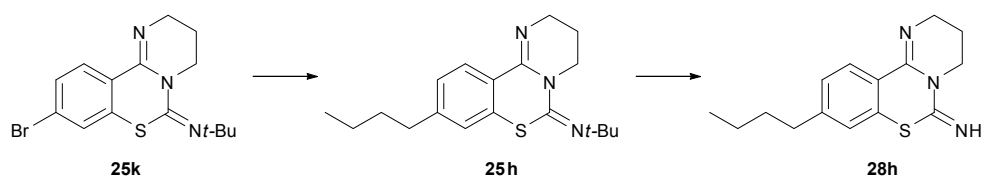

**9-(*n*-Butyl)-*N*-(*tert*-butyl)-3,4-dihydro-2*H*,6*H*-pyrimido[1,2-*c*][1,3]benzothiazin-6-imine (25h).** To a mixture of **25k** (352.3 mg, 1.0 mmol), *n*-butylboronic acid (152.9 mg, 1.5 mmol), Pd<sub>2</sub>(dba)<sub>3</sub>·CHCl<sub>3</sub> (51.8 mg, 0.05 mmol) and Ce<sub>2</sub>CO<sub>3</sub> (391.0 mg, 1.2 mmol) in 1,4-dioxane (2.5 cm<sup>3</sup>) was added P(*tert*-Bu)<sub>3</sub> (0.024 cm<sup>3</sup>, 0.1 mmol) under an Ar atmosphere, the mixture was stirred for 19 h under reflux. The mixture was filtered through a celite pad, and concentrated. The residue was purified by flash chromatography over aluminum oxide with *n*-hexane–EtOAc (10:0 to 19:1) to give the title compound **25h** as a colorless oil (21.0 mg, 6%): IR (neat)  $\nu_{\max}/\text{cm}^{-1}$ : 1593 (C=N);  $\delta_{\text{H}}$  (400 MHz, CDCl<sub>3</sub>) 0.91 (3H, t,  $J = 7.3$  Hz, CH<sub>3</sub>), 1.29-1.36 (2H, m, CH<sub>2</sub>), 1.38 (9H, s, 3×CH<sub>3</sub>), 1.54-1.62 (2H, m, CH<sub>2</sub>), 1.87-1.93 (2H, m, CH<sub>2</sub>), 2.57 (2H, t,  $J = 7.7$  Hz, CH<sub>2</sub>), 3.60 (2H, t,  $J = 5.4$  Hz, CH<sub>2</sub>), 3.86 (2H, t,  $J = 6.0$  Hz, CH<sub>2</sub>), 6.91 (1H, d,  $J = 1.2$  Hz, Ar), 7.01 (1H, dd,  $J = 8.3, 1.2$  Hz, Ar), 8.08 (1H, d,  $J = 8.3$  Hz, Ar).  $\delta_{\text{C}}$  (100 MHz, CDCl<sub>3</sub>) 13.8, 21.9, 22.2, 30.0 (3C), 33.0, 35.2, 45.0, 45.4, 54.1, 123.9, 125.3, 126.5, 128.3, 128.7, 138.6, 145.4, 147.9; HRMS (FAB):  $m/z$  calcd for C<sub>19</sub>H<sub>28</sub>N<sub>3</sub>S [M + H]<sup>+</sup> 330.2004; found: 330.1999.

**9-(*n*-Butyl)-3,4-dihydro-2*H*,6*H*-pyrimido[1,2-*c*][1,3]benzothiazin-6-imine (28h).** Using the general procedure as described for **28a**, compound **25h** (10.3 mg, 0.03 mmol) was allowed to react for 1 h with TFA (1.0 cm<sup>3</sup>) and MS4Å (150 mg). Purification by flash chromatography over aluminum oxide with *n*-hexane–EtOAc (9:1) gave the title compound **28h** as colorless solid (5.2 mg, 61%): mp 52–55 °C (from *n*-hexane); IR (neat)  $\nu_{\max}/\text{cm}^{-1}$ : 1621 (C=N), 1571 (C=N);  $\delta_{\text{H}}$  (400 MHz, CDCl<sub>3</sub>) 0.91 (3H, t,  $J = 7.3$  Hz, CH<sub>3</sub>), 1.29-1.38 (2H, m, CH<sub>2</sub>), 1.54-1.61 (2H, m, CH<sub>2</sub>), 1.93-1.99 (2H, m, CH<sub>2</sub>), 2.58 (2H, t,  $J = 7.7$  Hz, CH<sub>2</sub>), 3.67 (2H, t,  $J = 5.6$  Hz, CH<sub>2</sub>), 4.01 (2H, t,  $J = 6.2$  Hz, CH<sub>2</sub>), 6.84 (1H, d,  $J = 1.5$  Hz, Ar), 7.03-7.05 (1H, m, Ar), 8.11 (1H, d,  $J = 8.3$  Hz, Ar).  $\delta_{\text{C}}$  (100 MHz, CDCl<sub>3</sub>) 13.8, 21.1, 22.2, 33.0, 35.2, 43.8, 44.9, 123.0, 124.4, 126.8, 128.6, 128.8, 146.1, 146.6, 153.7; HRMS (FAB):  $m/z$  calcd for C<sub>15</sub>H<sub>20</sub>N<sub>3</sub>S [M + H]<sup>+</sup> 274.1378; found: 274.1372.

### Synthesis of 9-fluoro-3,4-dihydro-2*H*,6*H*-pyrimido[1,2-*c*][1,3]benzothiazin-6-imine (28i)

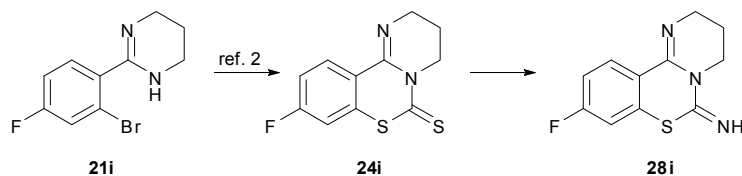

Compound **24i** (63.1 mg, 0.25 mmol) was subjected to general procedure as described for **28f** to give the title compound **28i** as colorless solid (30.4 mg, 52%): mp 123–124 °C (from CHCl<sub>3</sub>–*n*-hexane); IR (neat)  $\nu_{\max}/\text{cm}^{-1}$ : 1624 (C=N), 1585 (C=N);  $\delta_{\text{H}}$  (500 MHz, CDCl<sub>3</sub>) 1.94-2.00 (2H, m, CH<sub>2</sub>), 3.67 (2H, t,  $J = 5.7$  Hz, CH<sub>2</sub>), 4.01 (2H, t,  $J = 6.3$  Hz, CH<sub>2</sub>), 6.75 (1H, dd,  $J = 8.0, 2.9$  Hz, Ar), 6.91 (1H, ddd,  $J = 8.6, 8.0, 2.9$  Hz, Ar), 7.22 (1H, br s, NH), 8.24 (1H, dd,  $J = 8.6, 5.7$  Hz, Ar).  $\delta_{\text{C}}$  (125 MHz, CDCl<sub>3</sub>) 21.0, 43.8, 44.8, 110.0 (d,  $J = 25.2$  Hz), 113.9 (d,  $J = 21.6$  Hz), 123.1, 130.9 (d,  $J = 8.4$  Hz), 131.5 (d,  $J = 8.4$  Hz), 146.4 (d,  $J = 155.9$  Hz), 152.6, 163.7 (d,  $J = 254.3$  Hz);  $\delta_{\text{F}}$  (500 MHz, CDCl<sub>3</sub>) –109.1; *Anal.* calcd for C<sub>11</sub>H<sub>10</sub>FN<sub>3</sub>S:

C, 56.15; H, 4.28; N, 17.86. Found: C, 56.13; H, 4.44; N, 17.78.

### Synthesis of compound 28j

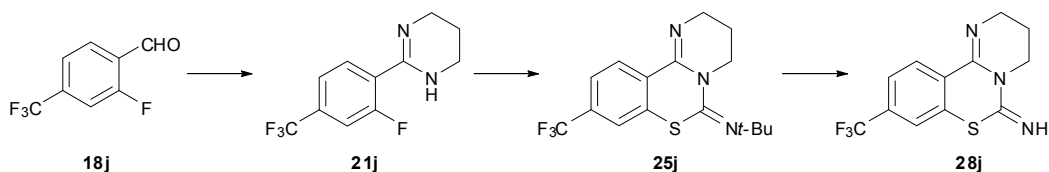

**2-(2-Fluoro-4-trifluoromethylphenyl)-1,4,5,6-tetrahydropyrimidin-2-ylideneamine (21j).** To a solution of **18j** (1.00 g, 5.21 mmol) in *t*-BuOH (49 cm<sup>3</sup>) was added propylenediamine (424.7 mg, 5.73 mmol). The mixture was stirred at 70 °C for 30 min, and then K<sub>2</sub>CO<sub>3</sub> (2.16 g, 15.6 mmol) and I<sub>2</sub> (1.65 g, 6.51 mmol) were added. After being stirred at same temperature for 3 h, the mixture was quenched with sat. Na<sub>2</sub>SO<sub>3</sub>. The organic layer was separated and concentrated. The resulting solid was dissolved with H<sub>2</sub>O, and then pH was adjusted to 12–14 with 2N NaOH. The whole was extracted with CHCl<sub>3</sub>, and the extract was dried over MgSO<sub>4</sub>. After concentration, the resulting solid was recrystallized from CHCl<sub>3</sub>–*n*-hexane to give the title compound **21j** as colorless crystals (0.84 g, 65%): mp 108–110 °C; IR (neat)  $\nu_{\max}/\text{cm}^{-1}$ : 1620 (C=N);  $\delta_{\text{H}}$  (500 MHz, CDCl<sub>3</sub>) 1.86–1.90 (2H, m, CH<sub>2</sub>), 3.52 (4H, t,  $J = 5.2$  Hz, 2 × CH<sub>2</sub>), 5.34 (1H, br s, NH), 7.33 (1H, d,  $J = 11.5$  Hz, Ar), 7.42 (1H, d,  $J = 8.6$  Hz, Ar), 7.96 (1H, dd,  $J = 8.6, 8.0$  Hz, Ar).  $\delta_{\text{C}}$  (100 MHz, CDCl<sub>3</sub>) 20.5, 42.2 (2C), 113.4 (dq,  $J = 26.9, 3.9$  Hz), 120.9–121.0 (m), 123.0 (dq,  $J = 2.5, 273.0$  Hz), 128.0 (d,  $J = 13.2$  Hz), 131.5 (d,  $J = 4.1$  Hz), 132.8 (dq,  $J = 9.1, 33.7$  Hz), 150.4, 159.6 (d,  $J = 249.1$  Hz).  $\delta_{\text{F}}$  (500 MHz, CDCl<sub>3</sub>) –63.4, –115.1; *Anal.* calcd for C<sub>11</sub>H<sub>10</sub>F<sub>4</sub>N<sub>2</sub>: C, 53.66; H, 4.09; N, 11.38. Found: C, 53.82; H, 4.06; N, 11.43.

***N*-(*tert*-Butyl)-3,4-dihydro-9-trifluoromethyl-2H,6H-pyrimido[1,2-*c*][1,3]benzothiazin-6-imine (25j).** Using the general procedure as described for **25e**, compound **21j** (246.2 mg, 1.0 mmol) was allowed to react at 80 °C for 2 h. Purification by flash chromatography over aluminum oxide with *n*-hexane–EtOAc (10:0 to 9:1) gave the title compound **25j** as colorless solid (219.4 mg, 64%): mp 82 °C (from *n*-hexane); IR (neat)  $\nu_{\max}/\text{cm}^{-1}$ : 1601 (C=N), 1569 (C=N);  $\delta_{\text{H}}$  (500 MHz, CDCl<sub>3</sub>) 1.39 (9H, s, 3 × CH<sub>3</sub>), 1.90–1.95 (2H, m, CH<sub>2</sub>), 3.64 (2H, t,  $J = 5.4$  Hz, CH<sub>2</sub>), 3.88 (2H, t,  $J = 6.3$  Hz, CH<sub>2</sub>), 7.38 (1H, s, Ar), 7.41 (1H, d,  $J = 8.6$  Hz, Ar), 8.31 (1H, d,  $J = 8.6$  Hz, Ar).  $\delta_{\text{C}}$  (100 MHz, CDCl<sub>3</sub>) 21.8, 29.9 (3C), 45.2, 45.4, 54.3, 121.6 (q,  $J = 4.0$  Hz), 122.4 (q,  $J = 3.6$  Hz), 123.5 (q,  $J = 272.7$  Hz), 129.2, 130.1, 130.7, 132.0 (q,  $J = 33.2$  Hz), 136.9, 146.9;  $\delta_{\text{F}}$  (500 MHz, CDCl<sub>3</sub>) –63.6. HRMS (FAB):  $m/z$  calcd for C<sub>16</sub>H<sub>19</sub>F<sub>3</sub>N<sub>3</sub>S [M + H]<sup>+</sup> 342.1252; found: 342.1252.

**3,4-Dihydro-9-trifluoromethyl-2H,6H-pyrimido[1,2-*c*][1,3]benzothiazin-6-imine (28j).** Using the general procedure as described for **28a**, compound **25j** (68.3 mg, 0.20 mmol) was allowed to react for 1 h. Purification by flash chromatography over aluminum oxide with *n*-hexane–EtOAc (8:2) gave the title compound **28j** as colorless solid (48.2 mg, 84%): mp 91.5 °C (from CHCl<sub>3</sub>–*n*-hexane); IR (neat)  $\nu_{\max}/\text{cm}^{-1}$ : 1625 (C=N), 1561 (C=N);  $\delta_{\text{H}}$  (500 MHz, CDCl<sub>3</sub>) 1.96–2.01 (2H, m, CH<sub>2</sub>), 3.71 (2H, t,  $J = 5.7$  Hz, CH<sub>2</sub>), 4.03 (2H, t,  $J = 6.3$  Hz, CH<sub>2</sub>), 7.27 (2H, m, Ar, NH), 7.44 (1H, dd,  $J = 8.3, 1.4$  Hz, Ar), 8.35 (1H, d,  $J = 8.6$  Hz, Ar).  $\delta_{\text{C}}$  (125 MHz, CDCl<sub>3</sub>) 20.9, 43.8, 45.0, 120.7 (q,  $J = 4.0$  Hz), 122.7 (q,  $J = 3.2$

Hz), 123.3 (q,  $J = 272.7$  Hz), 129.6, 129.7, 129.9, 132.5 (q,  $J = 33.2$  Hz), 145.6, 152.1;  $\delta_F$  (500 MHz,  $CDCl_3$ )  $-63.8$ . *Anal.* calcd for  $C_{12}H_{10}F_3N_3S$ : C, 50.52; H, 3.53; N, 14.73. Found: C, 50.51; H, 3.50; N, 14.69.

### Synthesis of compound 28k

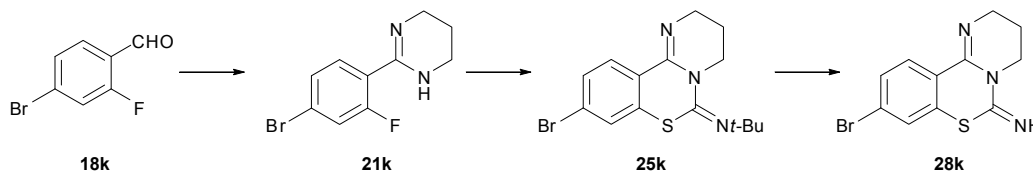

**2-(4-Bromo-2-fluorophenyl)-1,4,5,6-tetrahydropyrimidine (21k).** Compound **18k** (1.02 g, 5.0 mmol) was subjected to general procedure as described for **21j** to give the title compound **21k** as colorless crystals (0.80 g, 62%): mp 135–137 °C (from  $CHCl_3$ –*n*-hexane); IR (neat)  $\nu_{max}/cm^{-1}$ : 1622 (C=N);  $\delta_H$  (400 MHz,  $CDCl_3$ ) 1.83–1.89 (2H, m,  $CH_2$ ), 3.49 (4H, t,  $J = 5.9$  Hz,  $2 \times CH_2$ ), 4.88 (1H, br s, NH), 7.24 (1H, dd,  $J = 11.2, 2.0$  Hz, Ar), 7.30 (1H, dd,  $J = 8.5, 2.0$  Hz, Ar), 7.71 (1H, dd,  $J = 8.3, 8.5$  Hz, Ar).  $\delta_C$  (100 MHz,  $CDCl_3$ ) 20.6, 42.3 (2C), 119.5 (d,  $J = 27.3$  Hz), 123.4 (d,  $J = 3.3$  Hz), 123.6 (d,  $J = 5.0$  Hz), 127.7 (d,  $J = 3.3$  Hz), 131.6 (d,  $J = 4.1$  Hz), 150.7, 159.8 (d,  $J = 251.6$  Hz);  $\delta_F$  (500 MHz,  $CDCl_3$ )  $-114.7$ ; *Anal.* calcd for  $C_{10}H_{10}BrFN_2$ : C, 46.72; H, 3.92; N, 10.90. Found: C, 46.66; H, 3.82; N, 10.87.

**9-Bromo-N-(tert-butyl)-3,4-dihydro-2H,6H-pyrimido[1,2-c][1,3]benzothiazin-6-imine (25k).** Using the general procedure as described for **25e**, compound **21k** (257.1 mg, 1.00 mmol) was allowed to react at room temperature overnight. Purification by flash chromatography over aluminum oxide with *n*-hexane–EtOAc (10:0 to 9:1) gave the title compound **25k** as colorless solid (295.6 mg, 84%): mp 107–108 °C (from *n*-hexane); IR (neat)  $\nu_{max}/cm^{-1}$ : 1596 (C=N);  $\delta_H$  (400 MHz,  $CDCl_3$ ) 1.38 (9H, s,  $3 \times CH_3$ ), 1.87–1.93 (2H, m,  $CH_2$ ), 3.60 (2H, t,  $J = 5.6$  Hz,  $CH_2$ ), 3.85 (2H, t,  $J = 6.1$  Hz,  $CH_2$ ), 7.26–7.31 (2H, m, Ar), 8.05 (1H, d,  $J = 8.5$  Hz, Ar).  $\delta_C$  (100 MHz,  $CDCl_3$ ) 21.8, 30.0 (3C), 45.0, 45.4, 54.3, 124.4, 126.7, 126.8, 129.1, 130.1, 130.9, 137.2, 147.2; *Anal.* calcd for  $C_{15}H_{18}BrN_3S$ : C, 51.14; H, 5.15; N, 11.93. Found: C, 51.30; H, 5.07; N, 11.82.

**9-Bromo-3,4-dihydro-2H,6H-pyrimido[1,2-c][1,3]benzothiazin-6-imine (28k).** Using the general procedure as described for **28a**, compound **25k** (52.8 mg, 0.15 mmol) was allowed to react for 2 h with TFA (1.5  $cm^3$ ) and MS4Å (225 mg). Purification by flash chromatography over silica gel with *n*-hexane–EtOAc (2:1) gave the title compound **28k** as colorless solid (40.2 mg, 91%): mp 104–105 °C (from  $CHCl_3$ –*n*-hexane); IR (neat)  $\nu_{max}/cm^{-1}$ : 1620 (C=N), 1569 (C=N);  $\delta_H$  (400 MHz,  $CDCl_3$ ) 1.94–1.99 (2H, m,  $CH_2$ ), 3.67 (2H, t,  $J = 5.5$  Hz,  $CH_2$ ), 4.00 (2H, t,  $J = 6.0$  Hz,  $CH_2$ ), 7.19–7.34 (3H, m, NH, Ar), 8.08 (1H, d,  $J = 8.8$  Hz, Ar).  $\delta_C$  (100 MHz,  $CDCl_3$ ) 20.9, 43.8, 44.9, 125.0, 125.6, 125.9, 129.5, 130.4, 130.7, 145.8, 152.4; *Anal.* calcd for  $C_{11}H_{10}BrN_3S$ : C, 44.61; H, 3.40; N, 14.19. Found: C, 44.37; H, 3.28; N, 13.93.

### Synthesis of compound 28l

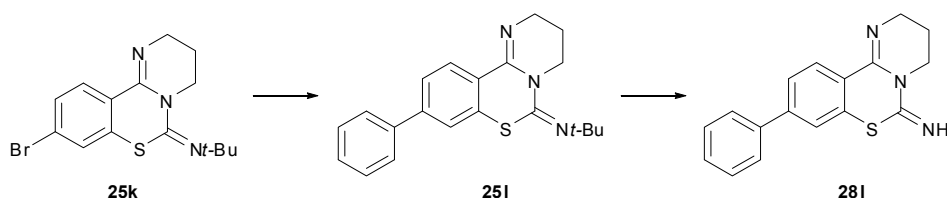

***N*-(*tert*-Butyl)-3,4-dihydro-9-phenyl-2*H*,6*H*-pyrimido[1,2-*c*][1,3]benzothiazin-6-imine (25I).** To a solution of **25k** (52.8 mg, 0.15 mmol) and phenylboronic acid (21.9 mg, 0.18 mmol) in a mixture of toluene (1.5 cm<sup>3</sup>), EtOH (0.9 cm<sup>3</sup>) and 1M aq. K<sub>2</sub>CO<sub>3</sub> (1.5 cm<sup>3</sup>) was added Pd(Ph<sub>3</sub>P)<sub>4</sub> (6.9 mg, 4 mol%) and PdCl<sub>2</sub>(dppf)·CH<sub>2</sub>Cl<sub>2</sub> (3.7 mg, 3 mol%). After being stirred at reflux for 1 h, the mixture was extracted with CHCl<sub>3</sub>. The extract was dried over MgSO<sub>4</sub> and concentrated. The residue was purified by flash chromatography over aluminum oxide with *n*-hexane–EtOAc (10:0 to 9:1) to give the title compound **25I** as colorless solid (44.8 mg, 85%): mp 122.5–124 °C (from CHCl<sub>3</sub>–*n*-hexane); IR (neat)  $\nu_{\max}/\text{cm}^{-1}$ : 1592 (C=N);  $\delta_{\text{H}}$  (500 MHz, CDCl<sub>3</sub>) 1.40 (9H, s, 3 × CH<sub>3</sub>), 1.90–1.95 (2H, m, CH<sub>2</sub>), 3.64 (2H, t, *J* = 5.4 Hz, CH<sub>2</sub>), 3.89 (2H, t, *J* = 6.0 Hz, CH<sub>2</sub>), 7.33–7.37 (2H, m, Ar), 7.41–7.44 (3H, m, Ar), 7.58 (2H, d, *J* = 6.9 Hz, Ar), 8.25 (1H, d, *J* = 8.6 Hz, Ar).  $\delta_{\text{C}}$  (125 MHz, CDCl<sub>3</sub>) 21.9, 30.0 (3C), 45.1, 45.4, 54.2, 122.7, 124.8, 126.5, 127.0 (2C), 128.0, 128.8 (2C), 128.9, 129.5, 138.3, 139.4, 142.9, 147.7; HRMS (FAB): *m/z* calcd for C<sub>21</sub>H<sub>24</sub>N<sub>3</sub>S [M + H]<sup>+</sup> 350.1691; found: 350.1683.

**3,4-Dihydro-9-phenyl-2*H*,6*H*-pyrimido[1,2-*c*][1,3]benzothiazin-6-imine (28I).** Using the general procedure as described for **28a**, compound **25I** (25.1 mg, 0.07 mmol) was allowed to react for 1 h with TFA (1.0 cm<sup>3</sup>) and MS4Å (105 mg). Purification by flash chromatography over aluminum oxide with *n*-hexane–EtOAc (8:2) gave the title compound **28I** as pale yellow solid (19.4 mg, 92%): mp 122–124 °C (from CHCl<sub>3</sub>–*n*-hexane); IR (neat)  $\nu_{\max}/\text{cm}^{-1}$ : 1619 (C=N), 1567 (C=N);  $\delta_{\text{H}}$  (500 MHz, CDCl<sub>3</sub>) 1.97–2.02 (2H, m, CH<sub>2</sub>), 3.72 (2H, t, *J* = 5.4 Hz, CH<sub>2</sub>), 4.04 (2H, t, *J* = 6.3 Hz, CH<sub>2</sub>), 7.25–7.26 (1H, m, Ar), 7.37–7.40 (1H, m, Ar), 7.43–7.47 (3H, m, Ar), 7.58 (2H, d, *J* = 7.4 Hz, Ar), 8.29 (1H, d, *J* = 8.6 Hz, Ar).  $\delta_{\text{C}}$  (125 MHz, CDCl<sub>3</sub>) 21.1, 43.8, 45.0, 121.8, 121.8, 125.1, 125.5, 127.0 (2C), 128.2, 128.9 (2C), 129.4, 139.2, 143.5, 146.5, 153.4; HRMS (FAB): *m/z* calcd for C<sub>17</sub>H<sub>16</sub>N<sub>3</sub>S [M + H]<sup>+</sup> 294.1065; found: 294.1069.

### Synthesis of compound 28m

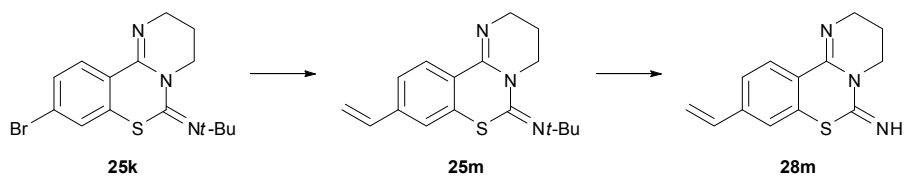

***N*-(*tert*-Butyl)-3,4-dihydro-9-vinyl-2*H*,6*H*-pyrimido[1,2-*c*][1,3]benzothiazin-6-imine (25m).** Using the general procedure as described for **25I**, compound **25k** (528.4 mg, 1.5 mmol) was allowed to react with vinylboronic acid pinacol ester (0.305 cm<sup>3</sup>, 1.8 mmol) for 1 h. Purification by flash chromatography over aluminum oxide with *n*-hexane–EtOAc (10:0 to 9:1) gave the title compound **25m** as colorless solid (455.7 mg, quant): mp 67–68 °C (from *n*-hexane); IR (neat)  $\nu_{\max}/\text{cm}^{-1}$ : 1589 (C=N);  $\delta_{\text{H}}$  (400 MHz, CDCl<sub>3</sub>) 1.39 (9H, s, 3 × CH<sub>3</sub>), 1.88–1.94 (2H, m, CH<sub>2</sub>), 3.62 (2H, t, *J* = 5.6 Hz, CH<sub>2</sub>), 3.87 (2H, t, *J* = 6.1 Hz, CH<sub>2</sub>), 5.33 (1H, d, *J* = 11.0 Hz, CH), 5.79 (1H, d, *J* = 17.6 Hz, CH), 6.64 (1H, dd, *J* = 17.6, 11.0 Hz,

CH), 7.12 (1H, d,  $J = 1.7$  Hz, Ar), 7.23 (1H, dd,  $J = 8.3, 1.7$  Hz, Ar), 8.14 (1H, d,  $J = 8.3$  Hz, Ar).  $\delta_C$  (100 MHz,  $\text{CDCl}_3$ ) 21.9, 30.0 (3C), 45.1, 45.4, 54.1, 115.9, 122.1, 123.7, 127.0, 128.6, 129.3, 135.4, 138.3, 139.3, 147.7; HRMS (FAB):  $m/z$  calcd for  $\text{C}_{17}\text{H}_{22}\text{N}_3\text{S}$   $[\text{M} + \text{H}]^+$  300.1534; found: 300.1536.

**3,4-Dihydro-9-vinyl-2H,6H-pyrimido[1,2-c][1,3]benzothiazin-6-imine (28m).** Using the general procedure as described for **28a**, compound **25m** (60.4 mg, 0.2 mmol) was allowed to react for 1 h. Purification by flash chromatography over aluminum oxide with *n*-hexane–EtOAc (8:2) gave the title compound **28m** as colorless solid (42.1 mg, 87%): mp 76–77 °C (from  $\text{CHCl}_3$ –*n*-hexane); IR (neat)  $\nu_{\text{max}}/\text{cm}^{-1}$ : 1618 (C=N), 1564 (C=N);  $\delta_H$  (400 MHz,  $\text{CDCl}_3$ ) 1.95–2.01 (2H, m,  $\text{CH}_2$ ), 3.69 (2H, t,  $J = 5.4$  Hz,  $\text{CH}_2$ ), 4.02 (2H, t,  $J = 6.1$  Hz,  $\text{CH}_2$ ), 5.36 (1H, d,  $J = 10.9$  Hz, CH), 5.81 (1H, d,  $J = 17.7$  Hz, CH), 6.65 (1H, dd,  $J = 17.7, 10.9$  Hz, CH), 7.04 (1H, s, Ar), 7.20 (1H, br s, NH), 7.26–7.28 (1H, m, Ar), 8.17 (1H, d,  $J = 8.5$  Hz, Ar).  $\delta_C$  (125 MHz,  $\text{CDCl}_3$ ) 21.0, 43.8, 44.9, 116.4, 121.1, 124.0, 125.8, 129.0 (2C), 135.2, 139.8, 146.4, 153.3; HRMS (FAB):  $m/z$  calcd for  $\text{C}_{13}\text{H}_{14}\text{N}_3\text{S}$   $[\text{M} + \text{H}]^+$  244.0908; found: 244.0911.

### Synthesis of compound 28n

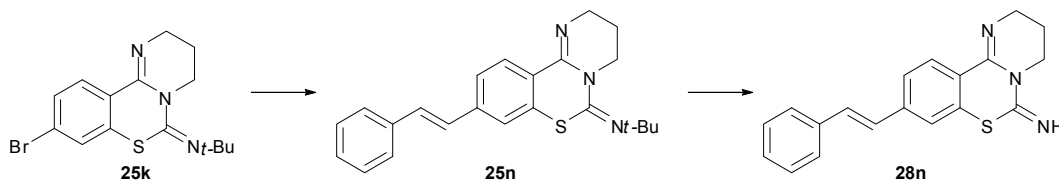

***N*-(*tert*-Butyl)-3,4-dihydro-9-styryl-2H,6H-pyrimido[1,2-c][1,3]benzothiazin-6-imine (25n).** Using the general procedure as described for **25l**, compound **25k** (52.8 mg, 0.15 mmol) was allowed to react with styrylboronic acid pinacol ester (41.4 mg, 0.18 mmol) for 1 h. Purification by flash chromatography over aluminum oxide with *n*-hexane–EtOAc (10:0 to 9:1) gave the title compound **25n** as colorless solid (50.9 mg, 90%): mp 124.5–125 °C (from  $\text{CHCl}_3$ –*n*-hexane); IR (neat)  $\nu_{\text{max}}/\text{cm}^{-1}$ : 1590 (C=N);  $\delta_H$  (400 MHz,  $\text{CDCl}_3$ ) 1.40 (9H, s, 3 ×  $\text{CH}_3$ ), 1.88–1.94 (2H, m,  $\text{CH}_2$ ), 3.63 (2H, t,  $J = 5.5$  Hz,  $\text{CH}_2$ ), 3.87 (2H, t,  $J = 6.1$  Hz,  $\text{CH}_2$ ), 7.01 (1H, d,  $J = 16.3$  Hz, CH), 7.14 (1H, d,  $J = 16.3$  Hz, CH), 7.22 (1H, d,  $J = 1.7$  Hz, Ar), 7.27–7.38 (4H, m, Ar), 7.50 (2H, d,  $J = 7.3$  Hz, Ar), 8.17 (1H, d,  $J = 8.3$  Hz, Ar).  $\delta_C$  (100 MHz,  $\text{CDCl}_3$ ) 21.9, 30.0 (3C), 45.1, 45.4, 54.2, 122.2, 124.0, 126.6, 126.7 (2C), 127.0, 128.1, 128.7 (2C), 128.8, 129.4, 130.7, 136.8, 138.3, 139.2, 147.7; HRMS (FAB):  $m/z$  calcd for  $\text{C}_{23}\text{H}_{26}\text{N}_3\text{S}$   $[\text{M} + \text{H}]^+$  376.1847; found: 376.1845.

**3,4-Dihydro-9-styryl-2H,6H-pyrimido[1,2-c][1,3]benzothiazin-6-imine (28n).** Using the general procedure as described for **28a**, compound **25n** (31.7 mg, 0.084 mmol) was allowed to react for 2 h. Purification by flash chromatography over aluminum oxide with *n*-hexane–EtOAc (7:3) gave the title compound **28n** as colorless solid (20.2 mg, 75%): mp 111–113 °C (from  $\text{CHCl}_3$ –*n*-hexane); IR (neat)  $\nu_{\text{max}}/\text{cm}^{-1}$ : 1618 (C=N), 1567 (C=N);  $\delta_H$  (400 MHz,  $\text{CDCl}_3$ ) 1.94–2.00 (2H, m,  $\text{CH}_2$ ), 3.69 (2H, t,  $J = 5.6$  Hz,  $\text{CH}_2$ ), 4.02 (2H, t,  $J = 6.2$  Hz,  $\text{CH}_2$ ), 7.00 (1H, d,  $J = 16.3$  Hz, CH), 7.12–7.16 (2H, m, CH, Ar), 7.20 (1H, br s, NH), 7.26–7.30 (1H, m, Ar), 7.34–7.38 (3H, m, Ar), 7.50 (2H, d,  $J = 7.6$  Hz, Ar), 8.20 (1H, d,  $J = 8.5$  Hz, Ar).  $\delta_C$  (100 MHz,  $\text{CDCl}_3$ ) 21.0, 43.8, 45.0, 121.2, 124.2, 125.5, 126.6, 126.7 (2C), 128.2, 128.7 (2C), 129.1, 129.2, 131.1, 136.6, 139.7, 146.4, 153.3; *Anal.* calcd for  $\text{C}_{19}\text{H}_{17}\text{N}_3\text{S}$ : C, 71.44; H, 5.36; N,



13.15. Found: C, 71.17; H, 5.24; N, 13.07.

### Synthesis of compound 28o

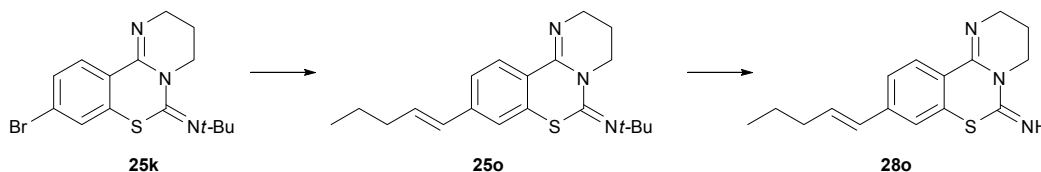

**N-(tert-Butyl)-3,4-dihydro-9-pentenyl-2H,6H-pyrimido[1,2-c][1,3]benzothiazin-6-imine (25o).** Using the general procedure as described for 25l, compound 25k (52.8 mg, 0.15 mmol) was allowed to react with pentenylboronic acid pinacol ester (35.2 mg, 0.18 mmol) for 1 h. Purification by flash chromatography over aluminum oxide with *n*-hexane–EtOAc (10:0 to 9:1) gave the title compound 25o as a colorless oil (44.2 mg, 86%): IR (neat)  $\nu_{\max}/\text{cm}^{-1}$ : 1590 (C=N);  $\delta_{\text{H}}$  (400 MHz,  $\text{CDCl}_3$ ) 0.95 (t,  $J = 7.4$  Hz, 3H,  $\text{CH}_3$ ), 1.38 (9H, s,  $3 \times \text{CH}_3$ ), 1.46-1.54 (2H, m,  $\text{CH}_2$ ), 1.87-1.93 (2H, m,  $\text{CH}_2$ ), 2.16-2.21 (2H, m,  $\text{CH}_2$ ), 3.61 (2H, t,  $J = 5.6$  Hz,  $\text{CH}_2$ ), 3.86 (2H, t,  $J = 6.2$  Hz,  $\text{CH}_2$ ), 6.29-6.30 (2H, m,  $2 \times \text{CH}$ ), 7.05 (1H, d,  $J = 1.7$  Hz, Ar), 7.17 (1H, dd,  $J = 8.3, 1.7$  Hz, Ar), 8.10 (1H, d,  $J = 8.3$  Hz, Ar).  $\delta_{\text{C}}$  (100 MHz,  $\text{CDCl}_3$ ) 13.7, 21.9, 22.3, 30.0 (3C), 35.1, 45.1, 45.4, 54.1, 121.6, 123.6, 126.0, 128.5, 128.6, 129.1, 133.4, 138.5, 139.8, 147.8; HRMS (FAB):  $m/z$  calcd for  $\text{C}_{20}\text{H}_{28}\text{N}_3\text{S} [\text{M} + \text{H}]^+$  342.2004; found: 342.2007.

**3,4-Dihydro-9-pentenyl-2H,6H-pyrimido[1,2-c][1,3]benzothiazin-6-imine (28o).** Using the general procedure as described for 28a, compound 25o (40.0 mg, 0.12 mmol) was allowed to react for 2 h. Purification by flash chromatography over aluminum oxide with *n*-hexane–EtOAc (8:2) gave the title compound 28o as a colorless oil (31.9 mg, 95%): IR (neat)  $\nu_{\max}/\text{cm}^{-1}$ : 1619 (C=N), 1568 (C=N);  $\delta_{\text{H}}$  (400 MHz,  $\text{CDCl}_3$ ) 0.95 (3H, t,  $J = 7.4$  Hz,  $\text{CH}_3$ ), 1.45-1.54 (2H, m,  $\text{CH}_2$ ), 1.93-1.99 (2H, m,  $\text{CH}_2$ ), 2.17-2.22 (2H, m,  $\text{CH}_2$ ), 3.68 (2H, t,  $J = 5.5$  Hz,  $\text{CH}_2$ ), 4.01 (2H, t,  $J = 6.2$  Hz,  $\text{CH}_2$ ), 6.29-6.31 (2H, m,  $2 \times \text{CH}$ ), 6.96 (1H, d,  $J = 1.7$  Hz, Ar), 7.16 (1H, br s, NH), 7.19 (1H, dd,  $J = 8.5, 1.7$  Hz, Ar), 8.13 (1H, d,  $J = 8.5$  Hz, Ar).  $\delta_{\text{C}}$  (100 MHz,  $\text{CDCl}_3$ ) 13.7, 21.0, 22.3, 35.1, 43.8, 44.9, 120.6, 123.8, 124.9, 128.3, 128.9, 129.0, 133.9, 140.3, 146.5, 153.5; HRMS (FAB):  $m/z$  calcd for  $\text{C}_{16}\text{H}_{20}\text{N}_3\text{S} [\text{M} + \text{H}]^+$  286.1378; found: 286.1376.

### Synthesis of compound 28p

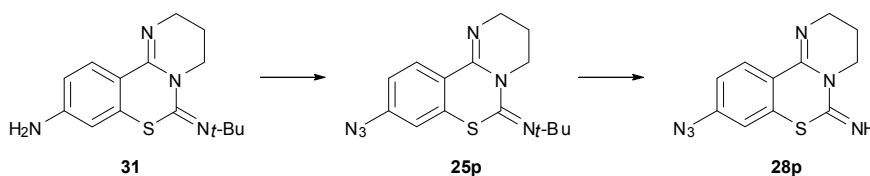

**9-Azido-N-(tert-butyl)-3,4-dihydro-2H,6H-pyrimido[1,2-c][1,3]benzothiazin-6-imine (25p).** To a solution of 31 (100.9 mg, 0.35 mmol) in AcOH (2  $\text{cm}^3$ ) and  $\text{H}_2\text{O}$  (1  $\text{cm}^3$ ) was added  $\text{NaNO}_2$  (33.8 mg, 0.49 mmol) at 0 °C, and the stirring was continued for 1 h.  $\text{NaN}_3$  (34.1 mg, 0.53 mmol) was added to the reaction mixture, and the reaction was continued for 30 min at rt. Reaction mixture was neutralized with  $\text{K}_2\text{CO}_3$ , and the whole was extracted with  $\text{CHCl}_3$ , and dried over  $\text{MgSO}_4$ . After concentration, the residue was purified by flash chromatography over aluminum oxide with *n*-hexane–EtOAc (9:1) to give the title compound 25p as pale yellow solid (77.3 mg, 70%): mp 79–80 °C (from *n*-hexane); IR (neat)  $\nu_{\max}/\text{cm}^{-1}$ :

2104 (N<sub>3</sub>), 1592 (C=N);  $\delta_{\text{H}}$  (400 MHz, CDCl<sub>3</sub>) 1.38 (9H, s, 3 × CH<sub>3</sub>), 1.88-1.94 (2H, m, CH<sub>2</sub>), 3.60 (2H, t,  $J = 5.6$  Hz, CH<sub>2</sub>), 3.86 (2H, t,  $J = 6.2$  Hz, CH<sub>2</sub>), 6.74 (1H, d,  $J = 2.3$  Hz, Ar), 6.84 (1H, dd,  $J = 8.5, 2.3$  Hz, Ar), 8.19 (1H, d,  $J = 8.5$  Hz, Ar).  $\delta_{\text{C}}$  (100 MHz, CDCl<sub>3</sub>) 21.8, 30.0 (3C), 45.0, 45.4, 54.2, 114.2, 116.8, 124.5, 130.3, 130.9, 137.4, 142.0, 147.1; HRMS (FAB):  $m/z$  calcd for C<sub>15</sub>H<sub>19</sub>N<sub>6</sub>S [M + H]<sup>+</sup> 315.1392; found: 315.1398.

**9-Azido-3,4-dihydro-2H,6H-pyrimido[1,2-c][1,3]benzothiazin-6-imine (28p).** Using the general procedure as described for **28a**, compound **25p** (77.3 mg, 0.25 mmol) was allowed to react for 2 h with TFA (3.5 cm<sup>3</sup>) and MS4Å (525 mg). Purification by recrystallization from MeOH–Et<sub>2</sub>O gave the title compound **28p** as pale yellow crystals (27.0 mg, 42%): mp 120–121 °C; IR (neat)  $\nu_{\text{max}}/\text{cm}^{-1}$ : 2107 (N<sub>3</sub>), 1615 (C=N), 1569 (C=N);  $\delta_{\text{H}}$  (400 MHz, DMSO-*d*<sub>6</sub>) 1.82-1.88 (2H, m, CH<sub>2</sub>), 3.56 (2H, t,  $J = 5.5$  Hz, CH<sub>2</sub>), 3.89 (2H, t,  $J = 5.4$  Hz, CH<sub>2</sub>), 6.97 (1H, dd,  $J = 8.8, 2.4$  Hz, Ar), 7.03 (1H, d,  $J = 2.4$  Hz, Ar), 8.17 (1H, d,  $J = 8.8$  Hz, Ar), 8.76 (1H, s, NH).  $\delta_{\text{C}}$  (100 MHz, DMSO-*d*<sub>6</sub>) 20.6, 43.1, 44.2, 113.7, 117.0, 122.6, 130.2, 130.8, 141.9, 144.7, 150.0; *Anal.* calcd for C<sub>11</sub>H<sub>10</sub>N<sub>6</sub>S: C, 51.15; H, 3.90; N, 32.54. Found: C, 51.07; H, 3.88; N, 32.28.

### Synthesis of compound 28q

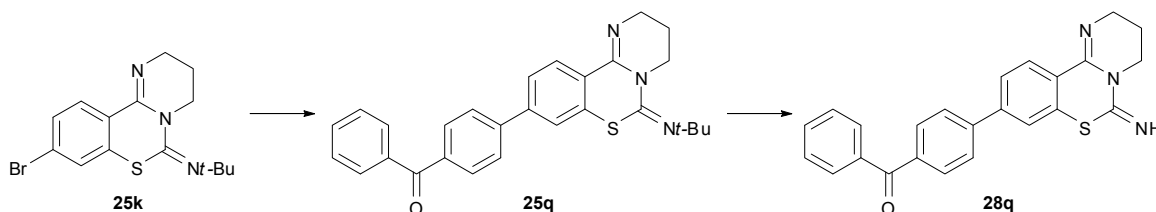

**9-(4-Benzoylphenyl)-N-(tert-butyl)-3,4-dihydro-2H,6H-pyrimido[1,2-c][1,3]benzothiazin-6-imine (25q).** Using the general procedure as described for **25i**, compound **25k** (52.8 mg, 0.15 mmol) was allowed to react with 4-benzoylphenylboronic acid (40.7 mg, 0.18 mmol) for 1 h. Purification by flash chromatography over aluminum oxide with *n*-hexane–EtOAc (8:2) gave the title compound **25q** as colorless solid (55.6 mg, 82%): mp 187–189 °C (from CHCl<sub>3</sub>–*n*-hexane); IR (neat)  $\nu_{\text{max}}/\text{cm}^{-1}$ : 1656 (C=O), 1593 (C=N);  $\delta_{\text{H}}$  (400 MHz, CDCl<sub>3</sub>) 1.41 (9H, s, 3 × CH<sub>3</sub>), 1.91-1.97 (2H, m, CH<sub>2</sub>), 3.65 (2H, t,  $J = 5.5$  Hz, CH<sub>2</sub>), 3.90 (2H, t,  $J = 6.1$  Hz, CH<sub>2</sub>), 7.39 (1H, d,  $J = 1.7$  Hz, Ar), 7.46-7.53 (3H, m, Ar), 7.60 (1H, t,  $J = 7.4$  Hz, Ar), 7.70 (2H, d,  $J = 8.0$  Hz, Ar), 7.82 (2H, d,  $J = 7.3$  Hz, Ar), 7.88 (2H, d,  $J = 8.0$  Hz, Ar), 8.30 (1H, d,  $J = 8.3$  Hz, Ar).  $\delta_{\text{C}}$  (100 MHz, CDCl<sub>3</sub>) 21.9, 30.0 (3C), 45.2, 45.4, 54.2, 123.0, 124.8, 126.9 (2C), 127.4, 128.3 (2C), 129.1, 129.9, 130.0 (2C), 130.7 (2C), 132.5, 136.9, 137.6, 137.9, 141.7, 143.3, 147.6, 196.1; HRMS (FAB):  $m/z$  calcd for C<sub>28</sub>H<sub>28</sub>N<sub>3</sub>OS [M + H]<sup>+</sup> 454.1953; found: 454.1954.

**9-(4-Benzoylphenyl)-3,4-dihydro-2H,6H-pyrimido[1,2-c][1,3]benzothiazin-6-imine (28q).** Using the general procedure as described for **28a**, compound **28q** (30.4 mg, 0.067 mmol) was allowed to react for 1 h with TFA (1.0 cm<sup>3</sup>) and MS4Å (150 mg). Purification by flash chromatography over aluminum oxide with *n*-hexane–EtOAc (7:3) gave the title compound **28q** as colorless solid (16.7 mg, 63%): mp 155–156 °C (from CHCl<sub>3</sub>–*n*-hexane); IR (neat)  $\nu_{\text{max}}/\text{cm}^{-1}$ : 1655 (C=O), 1619 (C=N), 1561 (C=N);  $\delta_{\text{H}}$  (400 MHz, CDCl<sub>3</sub>) 1.97-2.03 (2H, m, CH<sub>2</sub>), 3.72 (2H, t,  $J = 5.5$  Hz, CH<sub>2</sub>), 4.05 (2H, t,  $J = 6.1$  Hz, CH<sub>2</sub>),

7.30 (1H, d,  $J = 1.7$  Hz, Ar), 7.48-7.52 (3H, m, Ar), 7.59-7.63 (1H, m, Ar), 7.68 (2H, d,  $J = 8.3$  Hz, Ar), 7.81-7.83 (2H, m, Ar), 7.89 (2H, d,  $J = 8.3$  Hz, Ar), 8.32 (1H, d,  $J = 8.5$  Hz, Ar).  $\delta_C$  (100 MHz,  $CDCl_3$ ) 21.0, 43.8, 45.0, 122.0, 125.1, 126.2, 126.9 (2C), 128.3 (2C), 129.5, 129.6, 130.0 (2C), 130.7 (2C), 132.5, 137.1, 137.5, 142.2, 143.0, 146.3, 153.0, 196.0; HRMS (FAB):  $m/z$  calcd for  $C_{20}H_{18}N_3OS$   $[M + H]^+$  398.1327; found: 398.1333.

### Synthesis of compound 29a

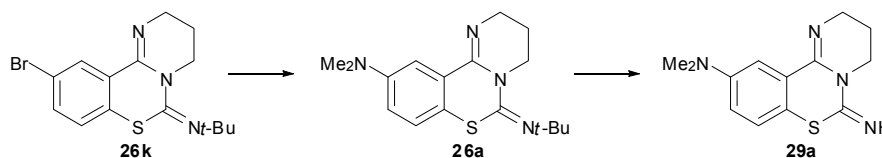

***N*-(*tert*-Butyl)-10-(*N,N*-dimethylamino)-3,4-dihydro-2*H*,6*H*-pyrimido[1,2-*c*][1,3]benzothiazin-6-imine (**26a**)**. To a mixture of **26k** (600.2 mg, 1.70 mmol) and  $Pd(Pt-Bu)_2$  (174.2 mg, 0.341 mmol) and  $KOt-Bu$  (573.3 mg, 5.11 mmol) in toluene (1.7  $cm^3$ ) was added 2.0M  $Me_2NH$  in THF (2.55  $cm^3$ , 5.11 mmol). The reaction was heated using a microwave reactor (standard mode) for 10 min at 170 °C. The whole was extracted with EtOAc. The extract was washed with brine, and dried over  $Na_2SO_4$ . After concentration, the residue was purified by flash chromatography over silica gel with *n*-hexane–EtOAc (6:4 to 5:5) to give the title compound **26a** as pale yellow solid (363.3 mg, 67.4%): mp 86.1 °C; IR (neat)  $\nu_{max}/cm^{-1}$ : 1583 (C=N);  $\delta_H$  (300 MHz,  $CDCl_3$ ) 1.38 (9H, s, 3  $\times$   $CH_3$ ), 1.86-1.94 (2H, m,  $CH_2$ ), 2.97 (6H, s, 2  $\times$   $CH_3$ ), 3.61 (2H, t,  $J = 5.3$  Hz,  $CH_2$ ), 3.86 (2H, t,  $J = 6.3$  Hz,  $CH_2$ ), 6.78 (1H, dd,  $J = 9.0, 3.0$  Hz, Ar), 6.98 (1H, d,  $J = 8.4$  Hz, Ar), 7.56 (1H, d,  $J = 2.4$  Hz, Ar).  $\delta_C$  (75 MHz,  $CDCl_3$ ) 22.0, 29.9 (3C), 40.8 (2C), 45.1, 45.5, 54.0, 111.6, 115.4, 115.8, 125.3, 128.7, 139.7, 148.8, 149.3; HRMS (FAB):  $m/z$  calcd for  $C_{17}H_{25}N_4S$   $[M + H]^+$  317.1800; found: 317.1796.

**10-(*N,N*-Dimethylamino)-3,4-dihydro-2*H*,6*H*-pyrimido[1,2-*c*][1,3]benzothiazin-6-imine (**29a**)**. TFA (0.63  $cm^3$ ) was added to a mixture of **26a** (20 mg, 0.063 mmol) and  $MS4\text{\AA}$  (110 mg, powder, activated by heating with Bunsen burner) in small amount of  $CHCl_3$ . After being stirred under reflux for 40 min, the mixture was added dropwise to  $Et_3N$  at 0 °C to adjust pH to 8–9. The whole was extracted with EtOAc. The extract was washed with sat.  $NaHCO_3$ , brine, and dried over  $Na_2SO_4$ . After concentration, the residue was purified by preparative TLC over aluminium oxide with *n*-hexane–EtOAc (7:3) to give the title compound **29a** as yellow solid (11.4 mg, 68.3%): mp 134.5 °C; IR (neat)  $\nu_{max}/cm^{-1}$ : 1617 (C=N), 1552 (C=N);  $\delta_H$  (300 MHz,  $CDCl_3$ ) 1.92-2.00 (2H, m,  $CH_2$ ), 2.97 (6H, s, 2  $\times$   $CH_3$ ), 3.68 (2H, t,  $J = 5.7$  Hz,  $CH_2$ ), 4.01 (2H, t,  $J = 6.3$  Hz,  $CH_2$ ), 6.79 (1H, dd,  $J = 8.7, 3.3$  Hz, Ar), 6.89 (1H, d,  $J = 8.7$  Hz, Ar), 7.08 (1H, br s, NH), 7.58 (1H, d,  $J = 2.7$  Hz, Ar).  $\delta_C$  (75 MHz,  $CDCl_3$ ) 20.8, 40.6 (2C), 44.1, 44.3, 111.8, 114.6, 116.3, 124.6, 126.3, 148.7, 149.4, 154.4; *Anal.* calcd for  $C_{13}H_{16}N_4S$ : C, 59.97; H, 6.19; N, 21.52. Found: C, 59.91; H, 6.19; N, 21.41.

### Synthesis of compound 29e

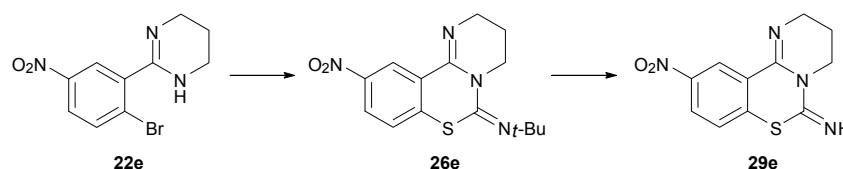

***N*-(*tert*-Butyl)-3,4-dihydro-10-nitro-2*H*,6*H*-pyrimido[1,2-*c*][1,3]benzothiazin-6-imine (26e).** To a mixture of **22e** (50 mg, 0.209 mmol) in DMAc (0.70 cm<sup>3</sup>) was added *tert*-butylisothiocyanate (0.053 cm<sup>3</sup>, 0.418 mmol) and KO*t*-Bu (46.9 mg, 0.418 mmol) at 0 °C under an N<sub>2</sub> atmosphere. After being stirred at 0 °C for 1 h, sat. NH<sub>4</sub>Cl was added. The whole was extracted with EtOAc. The extract was washed with brine, and dried over Na<sub>2</sub>SO<sub>4</sub>. After concentration, the residue was purified by flash chromatography over silica gel with *n*-hexane–EtOAc (10:0 to 9:1) to give the title compound **26e** as pale yellow solid (39.1 mg, 58.9%): mp 123.8 °C; IR (neat)  $\nu_{\max}/\text{cm}^{-1}$ : 1593 (NO<sub>2</sub>), 1520 (NO<sub>2</sub>);  $\delta_{\text{H}}$  (300 MHz, CDCl<sub>3</sub>) 1.40 (s, 9H, 3 × CH<sub>3</sub>), 1.90–1.98 (2H, m, CH<sub>2</sub>), 3.67 (2H, t, *J* = 5.6 Hz, CH<sub>2</sub>), 3.89 (2H, t, *J* = 6.3 Hz, CH<sub>2</sub>), 7.23 (1H, m, Ar), 8.13 (1H, dd, *J* = 8.7, 2.7 Hz, Ar), 9.11 (1H, d, *J* = 2.7 Hz, Ar).  $\delta_{\text{C}}$  (75 MHz, CDCl<sub>3</sub>) 21.7, 30.0 (3C), 45.1, 45.5, 54.5, 124.1, 124.3, 125.3, 128.5, 135.6, 137.1, 145.8, 146.1; HRMS (FAB): *m/z* calcd for C<sub>15</sub>H<sub>19</sub>N<sub>4</sub>O<sub>2</sub>S [M + H]<sup>+</sup> 319.1229; found: 319.1232.

**3,4-Dihydro-10-nitro-2*H*,6*H*-pyrimido[1,2-*c*][1,3]benzothiazin-6-imine (29e).** TFA (3.2 cm<sup>3</sup>) was added to compound **26e** (100 mg, 0.314 mmol). After being stirred under reflux for 1.5 h, the mixture was added dropwise to Et<sub>3</sub>N at 0 °C to adjust pH to 8–9. The whole was extracted with EtOAc. The extract was washed with sat. NaHCO<sub>3</sub>, brine, and dried over Na<sub>2</sub>SO<sub>4</sub>. After concentration, the residue was purified by preparative TLC over aluminium oxide with *n*-hexane–EtOAc (7:3) to give the title compound **29e** as orange solid (15.9 mg, 19.3%): mp 167.9 °C; IR (neat)  $\nu_{\max}/\text{cm}^{-1}$ : 1614 (C=N), 1576 (NO<sub>2</sub>), 1557 (C=N), 1519 (NO<sub>2</sub>);  $\delta_{\text{H}}$  (300 MHz, CDCl<sub>3</sub>) 1.97–2.04 (2H, m, CH<sub>2</sub>), 3.74 (2H, t, *J* = 5.6 Hz, CH<sub>2</sub>), 4.05 (2H, t, *J* = 6.2 Hz, CH<sub>2</sub>), 7.19 (1H, d, *J* = 9.0 Hz, Ar), 7.38 (1H, br s, NH), 8.17 (1H, dd, *J* = 8.7, 2.7 Hz, Ar), 9.13 (1H, d, *J* = 2.7 Hz, Ar).  $\delta_{\text{C}}$  (75 MHz, CDCl<sub>3</sub>) 20.8, 44.1, 44.9, 124.5 (2C), 124.8, 127.6, 136.7, 144.5, 146.3, 151.0; HRMS (FAB): *m/z* calcd for C<sub>11</sub>H<sub>11</sub>N<sub>4</sub>O<sub>2</sub>S [M + H]<sup>+</sup> 263.0603; found: 263.0606. The purity of the compound was 75% by HPLC.

### **Synthesis of compound 29f**

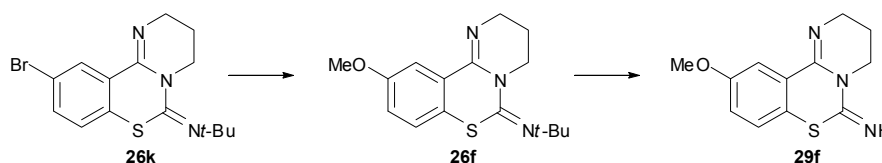

***N*-(*tert*-Butyl)-3,4-dihydro-10-methoxy-2*H*,6*H*-pyrimido[1,2-*c*][1,3]benzothiazin-6-imine (26f).** To a mixture of **25k** (500.3 mg, 1.42 mmol) and NaOMe (767 mg, 14.2 mmol, 28% solution in MeOH,) in DMF (2.5 cm<sup>3</sup>) was added CuBr (20.4 mg, 0.142 mmol). The mixture was stirred at 110 °C for 2.5 h. The whole was extracted with CH<sub>2</sub>Cl<sub>2</sub>. The extract was washed with brine, and dried over Na<sub>2</sub>SO<sub>4</sub>. After concentration, the residue was purified by flash chromatography over silica gel with *n*-hexane–EtOAc (6:4 to 4:6) to give the title compound **26f** as colorless solid (171.5 mg, 39.8%): mp 87.1 °C; IR (neat)  $\nu_{\max}/\text{cm}^{-1}$ : 1588 (C=N);  $\delta_{\text{H}}$  (300 MHz, CDCl<sub>3</sub>) 1.38 (9H, s, 3 × CH<sub>3</sub>), 1.87–1.95 (2H, m, CH<sub>2</sub>), 3.62 (2H, t,

$J = 5.6$  Hz, CH<sub>2</sub>), 3.86 (5H, m, CH<sub>3</sub>, CH<sub>2</sub>), 6.92 (1H, dd,  $J = 8.7, 2.7$  Hz, Ar), 7.00 (1H, d,  $J = 8.4$  Hz, Ar), 7.75 (1H, d,  $J = 3.3$  Hz, Ar).  $\delta_C$  (75 MHz, CDCl<sub>3</sub>) 21.9, 29.9 (3C), 45.1, 45.5, 54.1, 55.6, 111.3, 118.9, 120.2, 125.7, 128.9, 138.8, 148.1, 158.1; *Anal.* calcd for C<sub>16</sub>H<sub>21</sub>N<sub>3</sub>OS: C, 63.33; H, 6.98; N, 13.85. Found: C, 63.04; H, 6.97; N, 13.68.

**3,4-Dihydro-10-methoxy-2H,6H-pyrimido[1,2-c][1,3]benzothiazin-6-imine (29f).** TFA (0.88 cm<sup>3</sup>) was added to compound **26f** (26.7 mg, 0.088 mmol). After being stirred under reflux for 3 h, the mixture was added dropwise to Et<sub>3</sub>N at 0 °C to adjust pH to 8–9. The whole was extracted with EtOAc. The extract was washed with sat. NaHCO<sub>3</sub>, brine, and dried over Na<sub>2</sub>SO<sub>4</sub>. After concentration, the residue was purified by preparative TLC over aluminium oxide with *n*-hexane–EtOAc (7:3) to give the title compound **29f** as colorless solid (9.6 mg, 44%): mp 89.0 °C; IR (neat)  $\nu_{\max}/\text{cm}^{-1}$ : 1614 (C=N), 1562 (C=N);  $\delta_H$  (300 MHz, CDCl<sub>3</sub>) 1.93–2.00 (2H, m, CH<sub>2</sub>), 3.69 (2H, t,  $J = 5.4$  Hz, CH<sub>2</sub>), 3.85 (3H, s, CH<sub>3</sub>), 4.02 (2H, t,  $J = 6.2$  Hz, CH<sub>2</sub>), 6.92–6.98 (2H, m, Ar), 7.15 (1H, br s, NH), 7.78 (1H, s, Ar).  $\delta_C$  (75 MHz, CDCl<sub>3</sub>) 21.0, 43.9, 44.9, 55.6, 111.9, 119.3, 119.9, 124.8, 127.9, 146.7, 153.9, 158.3; *Anal.* calcd for C<sub>12</sub>H<sub>13</sub>N<sub>3</sub>OS: C, 58.28; H, 5.30; N, 16.99. Found: C, 58.24; H, 5.36; N, 16.46. The purity of the compound was 92% by HPLC.

### Synthesis of compound 29g

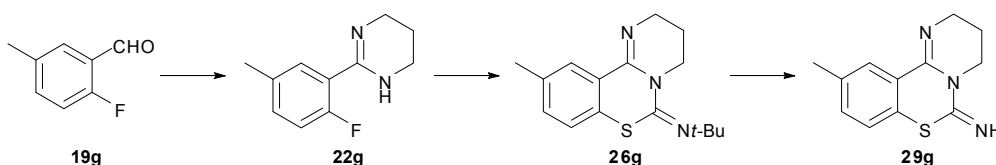

**2-(2-Fluoro-5-methylphenyl)-1,4,5,6-tetrahydropyrimidine (22g).** Compound **19g** (3.0 g, 21.7 mmol) was subjected to general procedure as described for **21j** to give the title **22g** as colorless crystals (3.1 g, 75%): mp 119–121 °C (from CHCl<sub>3</sub>–*n*-hexane); IR (neat)  $\nu_{\max}/\text{cm}^{-1}$ : 1626 (C=N);  $\delta_H$  (500 MHz, CDCl<sub>3</sub>) 1.84–1.89 (2H, m, CH<sub>2</sub>), 2.31 (3H, s, CH<sub>3</sub>), 3.51 (4H, t,  $J = 5.7$  Hz, 2 × CH<sub>2</sub>), 5.01 (1H, s, NH), 6.92 (1H, dd,  $J = 11.7, 8.3$  Hz, Ar), 7.09–7.12 (1H, m, Ar), 7.63 (1H, dd,  $J = 7.4, 2.3$  Hz, Ar).  $\delta_C$  (125 MHz, CDCl<sub>3</sub>) 20.5, 20.7, 42.3 (2C), 115.6 (d,  $J = 24.0$  Hz), 123.7 (d,  $J = 12.0$  Hz), 130.6 (d,  $J = 3.6$  Hz), 131.3 (d,  $J = 9.6$  Hz), 133.9 (d,  $J = 3.6$  Hz), 151.7, 158.4 (d,  $J = 244.7$  Hz);  $\delta_F$  (500 MHz, CDCl<sub>3</sub>) –122.4; HRMS (FAB):  $m/z$  calcd for C<sub>11</sub>H<sub>14</sub>FN<sub>2</sub> [M + H]<sup>+</sup> 193.1141; found: 193.1140.

***N*-(*tert*-Butyl)-3,4-dihydro-10-methyl-2H,6H-pyrimido[1,2-c][1,3]benzothiazin-6-imine (26g).** To a mixture of compound **22g** (0.50 g, 2.6 mmol) and KO*t*-Bu (0.58 g, 5.2 mmol) in DMAc (8.7 cm<sup>3</sup>) was added *tert*-butylisothiocyanate (0.66 cm<sup>3</sup>, 5.2 mmol) under an Ar atmosphere. After being stirred at 80 °C for 3 h, the whole was extracted with EtOAc. The whole was washed with sat. NaHCO<sub>3</sub>, brine, and dried over MgSO<sub>4</sub>. After concentration, the residue was purified by flash chromatography over silica gel with *n*-hexane–EtOAc (1:1) to give the title compound **26g** as colorless solid (0.21 g, 28%): mp 76–77 °C (from *n*-hexane); IR (neat)  $\nu_{\max}/\text{cm}^{-1}$ : 1597 (C=N);  $\delta_H$  (400 MHz, CDCl<sub>3</sub>) 1.38 (9H, s, 3 × CH<sub>3</sub>), 1.88–1.94 (2H, m, CH<sub>2</sub>), 2.33 (3H, s, CH<sub>3</sub>), 3.62 (2H, t,  $J = 5.6$  Hz, CH<sub>2</sub>), 3.87 (2H, t,  $J = 6.2$  Hz, CH<sub>2</sub>), 7.00 (1H, d,  $J = 8.0$  Hz, Ar), 7.13 (1H, dd,  $J = 8.0, 1.3$  Hz, Ar), 8.01 (1H, d,  $J = 1.3$  Hz, Ar).  $\delta_C$  (100 MHz,



CDCl<sub>3</sub>) 21.0, 22.0, 29.9 (3C), 45.1, 45.4, 54.1, 124.4, 125.7, 127.6, 128.6, 131.1, 135.9, 138.7, 148.2; HRMS (FAB): *m/z* calcd for C<sub>16</sub>H<sub>22</sub>N<sub>3</sub>S [M + H]<sup>+</sup> 288.1534; found: 288.1535.

**3,4-Dihydro-10-methyl-2*H*,6*H*-pyrimido[1,2-*c*][1,3]benzothiazin-6-imine (29g).** Using the general procedure as described for **28a**, compound **26g** (200 mg, 0.7 mmol) was allowed to react for 1 h with TFA (3.0 cm<sup>3</sup>) and MS4Å (450 mg). Purification by preparative TLC over aluminum oxide with *n*-hexane–EtOAc (9:1) gave the title compound **29g** as colorless solid (150 mg, 92%): mp 116 °C (from CHCl<sub>3</sub>–*n*-hexane); IR (neat)  $\nu_{\max}/\text{cm}^{-1}$ : 1623 (C=N), 1556 (C=N);  $\delta_{\text{H}}$  (400 MHz, CDCl<sub>3</sub>) 1.94–2.00 (2H, m, CH<sub>2</sub>), 2.34 (3H, s, CH<sub>3</sub>), 3.69 (2H, t, *J* = 5.6 Hz, CH<sub>2</sub>), 4.01 (2H, t, *J* = 6.1 Hz, CH<sub>2</sub>), 6.94 (1H, d, *J* = 8.0 Hz, Ar), 7.15–7.17 (2H, m, Ar, NH), 8.04 (1H, s, Ar).  $\delta_{\text{C}}$  (100 MHz, CDCl<sub>3</sub>) 21.0, 21.1, 43.8, 44.9, 123.5, 125.4, 126.5, 129.0, 131.6, 136.3, 146.9, 153.7; HRMS (FAB): *m/z* calcd for C<sub>12</sub>H<sub>14</sub>N<sub>3</sub>S [M + H]<sup>+</sup> 232.0908; found: 239.0913.

### Synthesis of compound 29k

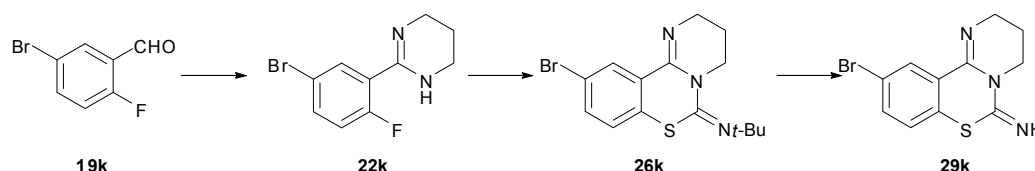

**2-(5-Bromo-2-fluorophenyl)-1,4,5,6-tetrahydropyrimidine (22k).** Compound **19k** (1.02 g, 5.0 mmol) was subjected to general procedure as described for **21j** to give the title compound **22k** as colorless crystals (1.02 g, 79%): mp 121–122 °C (from CHCl<sub>3</sub>–*n*-hexane); IR (neat)  $\nu_{\max}/\text{cm}^{-1}$ : 1623 (C=N);  $\delta_{\text{H}}$  (400 MHz, CDCl<sub>3</sub>) 1.83–1.89 (2H, m, CH<sub>2</sub>), 3.50 (4H, t, *J* = 5.7 Hz, 2 × CH<sub>2</sub>), 5.28 (1H, br s, NH), 6.94 (1H, dd, *J* = 11.1, 8.8 Hz, Ar), 7.42 (1H, ddd, *J* = 8.8, 4.4, 2.7 Hz, Ar), 7.97 (1H, dd, *J* = 6.8, 2.7 Hz, Ar).  $\delta_{\text{C}}$  (100 MHz, CDCl<sub>3</sub>) 20.6, 42.1 (2C), 117.1 (d, *J* = 3.3 Hz), 117.7 (d, *J* = 25.7 Hz), 126.2 (d, *J* = 13.2 Hz), 133.3 (d, *J* = 3.3 Hz), 133.6 (d, *J* = 9.1 Hz), 150.3, 159.1 (d, *J* = 247.5 Hz);  $\delta_{\text{F}}$  (500 MHz, CDCl<sub>3</sub>) –119.5; *Anal.* calcd for C<sub>10</sub>H<sub>10</sub>BrFN<sub>2</sub>: C, 46.72; H, 3.92; N, 10.90. Found: C, 46.59; H, 3.87; N, 10.89.

**10-Bromo-N-(tert-butyl)-3,4-dihydro-2*H*,6*H*-pyrimido[1,2-*c*][1,3]benzothiazin-6-imine (26k).** Using the general procedure as described for **25e**, compound **22k** (257.1 mg, 1.00 mmol) was allowed to react at room temperature overnight. Purification by flash chromatography over aluminum oxide with *n*-hexane–EtOAc (10:0 to 9:1) gave the title compound **26k** as colorless solid (111.6 mg, 32%): mp 93–94 °C (from *n*-hexane); IR (neat)  $\nu_{\max}/\text{cm}^{-1}$ : 1599 (C=N);  $\delta_{\text{H}}$  (400 MHz, CDCl<sub>3</sub>) 1.38 (9H, s, 3 × CH<sub>3</sub>), 1.88–1.93 (2H, m, CH<sub>2</sub>), 3.62 (2H, t, *J* = 5.6 Hz, CH<sub>2</sub>), 3.86 (2H, t, *J* = 6.1 Hz, CH<sub>2</sub>), 6.97 (1H, d, *J* = 8.5 Hz, Ar), 7.41 (1H, dd, *J* = 8.5, 2.2 Hz, Ar), 8.36 (1H, d, *J* = 2.2 Hz, Ar).  $\delta_{\text{C}}$  (100 MHz, CDCl<sub>3</sub>) 21.8, 29.9 (3C), 45.1, 45.4, 54.2, 119.7, 125.9, 128.1, 129.3, 131.2, 133.0, 137.4, 146.7; *Anal.* calcd for C<sub>15</sub>H<sub>18</sub>BrN<sub>3</sub>S: C, 51.14; H, 5.15; N, 11.93. Found: C, 51.09; H, 4.98; N, 11.89.

**10-Bromo-3,4-dihydro-2*H*,6*H*-pyrimido[1,2-*c*][1,3]benzothiazin-6-imine (29k).** Using the general procedure as described for **28a**, compound **26k** (52.8 mg, 0.15 mmol) was allowed to react for 2 h with TFA (1.5 cm<sup>3</sup>) and MS4Å (225 mg). Purification by flash chromatography over silica gel with





with vinylboronic acid pinacol ester (0.031 cm<sup>3</sup>, 0.18 mmol) for 1 h. Purification by flash chromatography over aluminum oxide with *n*-hexane–EtOAc (10:0 to 9:1) gave the title compound **26m** as a colorless oil (30.5 mg, 68%): IR (neat)  $\nu_{\max}/\text{cm}^{-1}$ : 1595 (C=N);  $\delta_{\text{H}}$  (400 MHz, CDCl<sub>3</sub>) 1.38 (9H, s, 3 × CH<sub>3</sub>), 1.89–1.94 (2H, m, CH<sub>2</sub>), 3.63 (2H, t,  $J = 5.4$  Hz, CH<sub>2</sub>), 3.87 (2H, t,  $J = 6.0$  Hz, CH<sub>2</sub>), 5.24 (1H, d,  $J = 11.0$  Hz, CH), 5.77 (1H, d,  $J = 17.6$  Hz, CH), 6.69 (1H, dd,  $J = 17.6, 11.0$  Hz, CH), 7.07 (1H, d,  $J = 8.3$  Hz, Ar), 7.40 (1H, dd,  $J = 8.3, 2.0$  Hz, Ar), 8.20 (1H, d,  $J = 2.0$  Hz, Ar).  $\delta_{\text{C}}$  (100 MHz, CDCl<sub>3</sub>) 21.9, 30.0 (3C), 45.1, 45.4, 54.1, 114.1, 124.7, 126.6, 127.4, 127.8, 128.2, 135.7, 135.9, 138.2, 147.9; HRMS (FAB):  $m/z$  calcd for C<sub>17</sub>H<sub>22</sub>N<sub>3</sub>S [M + H]<sup>+</sup> 300.1534; found: 300.1532.

**3,4-Dihydro-10-vinyl-2H,6H-pyrimido[1,2-*c*][1,3]benzothiazin-6-imine (29m).** Using the general procedure as described for **28a**, compound **26m** (7.3 mg, 0.024 mmol) was allowed to react for 1 h with TFA (1.0 cm<sup>3</sup>) and MS4Å (150 mg). Purification by flash chromatography over aluminum oxide with *n*-hexane–EtOAc (9:1) gave the title compound **29m** as colorless solid (3.7 mg, 62%): mp 69–70 °C (from CHCl<sub>3</sub>–*n*-hexane); IR (neat)  $\nu_{\max}/\text{cm}^{-1}$ : 1622 (C=N), 1550 (C=N);  $\delta_{\text{H}}$  (400 MHz, CDCl<sub>3</sub>) 1.95–2.01 (2H, m, CH<sub>2</sub>), 3.70 (2H, t,  $J = 5.7$  Hz, CH<sub>2</sub>), 4.02 (2H, t,  $J = 6.2$  Hz, CH<sub>2</sub>), 5.27 (1H, dd,  $J = 10.7, 0.6$  Hz, CH), 5.79 (1H, dd,  $J = 17.7, 0.6$  Hz, CH), 6.69 (1H, dd,  $J = 17.7, 10.7$  Hz, CH), 7.00 (1H, d,  $J = 8.3$  Hz, Ar), 7.19 (1H, br s, NH), 7.42 (1H, dd,  $J = 8.3, 2.0$  Hz, Ar), 8.23 (1H, d,  $J = 2.0$  Hz, Ar).  $\delta_{\text{C}}$  (100 MHz, CDCl<sub>3</sub>) 21.0, 43.8, 44.9, 114.5, 123.8, 126.8, 126.9, 127.8, 127.9, 135.6, 135.9, 146.5, 153.2; HRMS (FAB):  $m/z$  calcd for C<sub>13</sub>H<sub>14</sub>N<sub>3</sub>S [M + H]<sup>+</sup> 244.0908; found: 244.0902.

### Synthesis of compound 29q

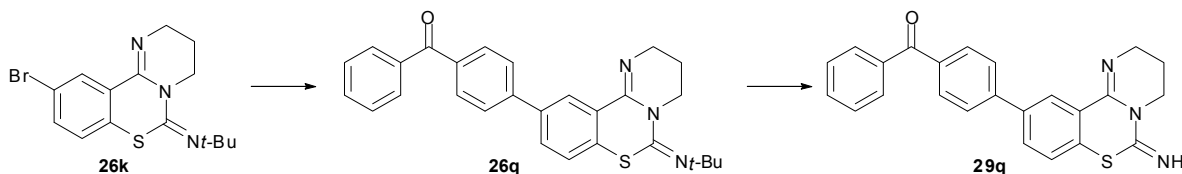

**10-(4-Benzoylphenyl)-*N*-(*tert*-butyl)-3,4-dihydro-2H,6H-pyrimido[1,2-*c*][1,3]benzothiazin-6-imine (26q).** Using the general procedure as described for **25l**, compound **26k** (52.8 mg, 0.15 mmol) was allowed to react with 4-benzoylphenylboronic acid (40.7 mg, 0.18 mmol) for 1 h. Purification by flash chromatography over aluminum oxide with *n*-hexane–EtOAc (8:2) gave the title compound **26q** as colorless solid (65.1 mg, 96%): mp 192–193 °C (from CHCl<sub>3</sub>–*n*-hexane); IR (neat)  $\nu_{\max}/\text{cm}^{-1}$ : 1654 (C=O), 1592 (C=N);  $\delta_{\text{H}}$  (400 MHz, CDCl<sub>3</sub>) 1.41 (9H, s, 3 × CH<sub>3</sub>), 1.91–1.96 (2H, m, CH<sub>2</sub>), 3.65 (2H, t,  $J = 5.5$  Hz, CH<sub>2</sub>), 3.90 (2H, t,  $J = 6.1$  Hz, CH<sub>2</sub>), 7.39 (1H, d,  $J = 1.7$  Hz, Ar), 7.46–7.52 (3H, m, Ar), 7.58–7.62 (1H, m, Ar), 7.70 (2H, d,  $J = 8.5$  Hz, Ar), 7.82 (2H, dd,  $J = 8.3, 1.2$  Hz, Ar), 7.88 (2H, d,  $J = 8.5$  Hz, Ar), 8.30 (1H, d,  $J = 8.5$  Hz, Ar).  $\delta_{\text{C}}$  (125 MHz, CDCl<sub>3</sub>) 21.9, 30.0 (3C), 45.1, 45.4, 54.2, 123.0, 124.8, 126.9 (2C), 127.3, 128.3 (2C), 129.1, 129.8, 130.0 (2C), 130.7 (2C), 132.5, 136.9, 137.6, 137.9, 141.6, 143.3, 147.5, 196.1; HRMS (FAB):  $m/z$  calcd for C<sub>28</sub>H<sub>28</sub>N<sub>3</sub>OS [M + H]<sup>+</sup> 454.1953; found: 454.1952.

**10-(4-Benzoylphenyl)-3,4-dihydro-2H,6H-pyrimido[1,2-*c*][1,3]benzothiazin-6-imine (29q).** Using the general procedure as described for **28a**, compound **26q** (36.2 mg, 0.08 mmol) was allowed to react for 1 h

with TFA (1.0 cm<sup>3</sup>) and MS4Å (150 mg). Purification by flash chromatography over aluminum oxide with *n*-hexane–EtOAc (7:3) gave the title compound **29q** as colorless solid (23.4 mg, 74%): mp 163–165 °C (from CHCl<sub>3</sub>–*n*-hexane); IR (neat)  $\nu_{\max}/\text{cm}^{-1}$ : 1654 (C=O), 1622 (C=N), 1561 (C=N);  $\delta_{\text{H}}$  (400 MHz, CDCl<sub>3</sub>) 1.97–2.03 (2H, m, CH<sub>2</sub>), 3.72 (2H, t,  $J = 5.6$  Hz, CH<sub>2</sub>), 4.05 (2H, t,  $J = 6.2$  Hz, CH<sub>2</sub>), 7.15 (1H, d,  $J = 8.0$  Hz, Ar), 7.48–7.52 (2H, m, Ar), 7.58–7.64 (2H, m, Ar), 7.73 (2H, d,  $J = 8.5$  Hz, Ar), 7.82 (2H, dd,  $J = 8.2, 1.3$  Hz, Ar), 7.88 (2H, d,  $J = 8.5$  Hz, Ar), 8.57 (1H, d,  $J = 2.0$  Hz, Ar).  $\delta_{\text{C}}$  (100 MHz, CDCl<sub>3</sub>) 21.0, 43.9, 45.0, 124.3, 126.7 (2C), 127.2, 127.6, 128.3 (2C), 128.8, 129.2, 130.0 (2C), 130.7 (2C), 132.4, 136.5, 137.7, 138.0, 143.7, 146.3, 152.9, 196.1; HRMS (FAB):  $m/z$  calcd for C<sub>24</sub>H<sub>20</sub>N<sub>3</sub>OS [M + H]<sup>+</sup> 398.1327; found: 398.1327.

### Synthesis of compound 30r

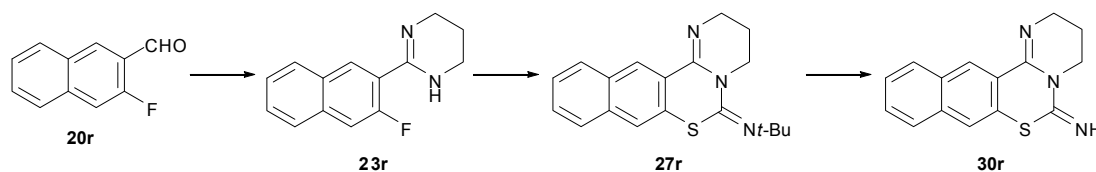

**2-(3-Fluoronaphthalen-2-yl)-1,4,5,6-tetrahydropyrimidine (23r).** Compound **20r** (0.96 g, 5.52 mmol) was subjected to general procedure as described for **21j** to give the title compound **23r** as pale yellow crystals (0.85 g, 67%): mp 128–130 °C (from CHCl<sub>3</sub>–EtOAc–Et<sub>2</sub>O); IR (neat)  $\nu_{\max}/\text{cm}^{-1}$ : 1619 (C=N);  $\delta_{\text{H}}$  (500 MHz, CDCl<sub>3</sub>) 1.86–1.91 (2H, m, CH<sub>2</sub>), 3.52 (4H, t,  $J = 5.7$  Hz, 2 × CH<sub>2</sub>), 5.21 (1H, br s, NH), 7.41–7.44 (2H, m, Ar), 7.49 (1H, t,  $J = 7.4$  Hz, Ar), 7.73 (1H, d,  $J = 8.6$  Hz, Ar), 7.83 (1H, d,  $J = 8.6$  Hz, Ar), 8.27 (1H, d,  $J = 8.0$  Hz, Ar).  $\delta_{\text{C}}$  (125 MHz, CDCl<sub>3</sub>) 20.5, 42.2 (2C), 111.7 (d,  $J = 22.8$  Hz), 124.5 (d,  $J = 16.8$  Hz), 125.6 (d,  $J = 2.4$  Hz), 126.7 (d,  $J = 4.8$  Hz), 127.5, 128.6, 130.1, 130.9 (d,  $J = 4.8$  Hz), 134.2 (d,  $J = 9.6$  Hz), 151.9, 157.8 (d,  $J = 247.1$  Hz).  $\delta_{\text{F}}$  (500 MHz, CDCl<sub>3</sub>) –119.8; HRMS (FAB)  $m/z$  calcd for C<sub>14</sub>H<sub>14</sub>FN<sub>2</sub> [M + H]<sup>+</sup> 229.1141; found: 229.1143.

**N-(tert-Butyl)-3,4-dihydro-2H,6H-pyrimido[1,2-c]naphtho[2,3-e][1,3]thiazine-6-imine (27r).** Using the general procedure as described for **25e**, compound **23r** (228.3 mg, 1.00 mmol) was allowed to react at rt overnight. Purification by flash chromatography over silica gel with *n*-hexane–EtOAc (1:1) gave the title compound **27r** as colorless solid (284.8 mg, 88%): mp 82.5–83.5 °C, IR (neat)  $\nu_{\max}/\text{cm}^{-1}$ : 1594 (C=N);  $\delta_{\text{H}}$  (400 MHz, CDCl<sub>3</sub>) 1.42 (9H, s, 3 × CH<sub>3</sub>), 1.92–1.98 (2H, m, CH<sub>2</sub>), 3.69 (2H, t,  $J = 5.6$  Hz, CH<sub>2</sub>), 3.91 (2H, t,  $J = 6.2$  Hz, CH<sub>2</sub>), 7.38–7.43 (1H, m, Ar), 7.45–7.49 (1H, m, Ar), 7.60 (1H, s, Ar), 7.69 (1H, d,  $J = 7.8$  Hz, Ar), 7.87 (1H, d,  $J = 8.0$  Hz, Ar), 8.70 (1H, s, Ar).  $\delta_{\text{C}}$  (100 MHz, CDCl<sub>3</sub>) 22.0, 30.1 (3C), 45.3, 45.5, 54.3, 122.5, 125.8, 125.9, 126.3, 126.5, 127.8, 128.5, 129.2, 131.7, 133.9, 138.4, 148.5; HRMS (FAB)  $m/z$  calcd for C<sub>19</sub>H<sub>22</sub>N<sub>3</sub>S [M + H]<sup>+</sup> 324.1534; found: 324.1526.

**3,4-Dihydro-2H,6H-pyrimido[1,2-c]naphtho[2,3-e][1,3]thiazine-6-imine (30r).** Using the general procedure as described for **28a**, compound **27r** (64.7 mg, 0.2 mmol) was allowed to react for 2 h. Purification by flash chromatography over aluminum oxide with *n*-hexane–EtOAc (4:1) gave the title compound **30r** as colorless solid (36.6 mg, 68%): mp 180–181 °C (from CHCl<sub>3</sub>–*n*-hexane); IR (neat)  $\nu_{\max}/\text{cm}^{-1}$ : 1627 (C=N), 1572 (C=N);  $\delta_{\text{H}}$  (400 MHz, CDCl<sub>3</sub>) 1.98–2.04 (2H, m, CH<sub>2</sub>), 3.75 (2H, t,  $J = 5.5$

Hz, CH<sub>2</sub>), 4.06 (2H, t, *J* = 6.2 Hz, CH<sub>2</sub>), 7.40-7.51 (3H, m, Ar), 7.68 (1H, d, *J* = 8.3 Hz, Ar), 7.87 (1H, d, *J* = 8.3 Hz, Ar), 8.74 (1H, s, Ar). δ<sub>C</sub> (100 MHz, CDCl<sub>3</sub>) 21.1, 43.9, 45.1, 121.6, 125.0, 125.4, 126.1, 126.3, 128.1, 129.2, 129.2, 131.6, 133.9, 147.1, 153.4; HRMS (FAB) *m/z* calcd for C<sub>15</sub>H<sub>14</sub>N<sub>3</sub>S [M + H]<sup>+</sup> 268.0908; found: 268.0909.

### **Synthesis of 3,4-dihydro-2*H*,6*H*-pyrimido[1,2-*c*]pyrido[3,2-*e*][1,3]thiazine-6-imine (30s)**

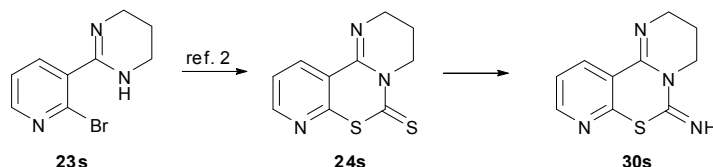

Using general procedure as described for **28f**, reaction of **24s** (58.8 mg, 0.25 mmol) and purification by flash chromatography over aluminum oxide with *n*-hexane–EtOAc (7:3) gave the title compound **30s** as colorless solid (17.4 mg, 32%): mp 181–183 °C (from CHCl<sub>3</sub>–*n*-hexane); IR (neat)  $\nu_{\max}/\text{cm}^{-1}$ : 1624 (C=N), 1582 (C=N); δ<sub>H</sub> (500 MHz, CDCl<sub>3</sub>) 1.96-2.01 (2H, m, CH<sub>2</sub>), 3.70 (2H, t, *J* = 5.7 Hz, CH<sub>2</sub>), 4.05 (2H, t, *J* = 6.3 Hz, CH<sub>2</sub>), 7.17 (1H, dd, *J* = 8.0, 4.6 Hz, Ar), 7.39 (1H, br s, NH), 8.46-8.50 (2H, m, Ar). δ<sub>C</sub> (125 MHz, CDCl<sub>3</sub>) 20.8, 43.8, 45.2, 121.4, 123.7, 136.3, 145.3, 151.2, 151.3, 153.5; HRMS (FAB): *m/z* calcd for C<sub>10</sub>H<sub>11</sub>N<sub>4</sub>S [M + H]<sup>+</sup> 219.0704; found: 219.0703.

### **Synthesis of compound 30k**

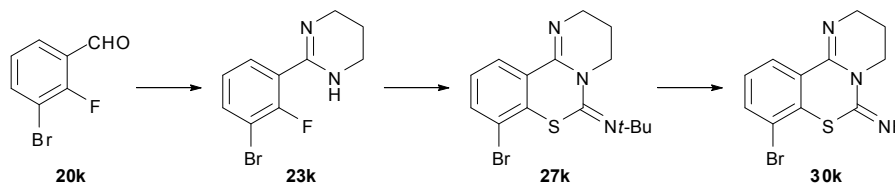

**2-(3-Bromo-2-fluoro-phenyl)-1,4,5,6-tetrahydropyrimidine (23k).** Compound **20k** (0.71 g, 3.5 mmol) was subjected to general procedure as described for **21j** to give the title compound **23k** as colorless crystals (0.62 g, 69%): mp 99 °C; IR (neat)  $\nu_{\max}/\text{cm}^{-1}$ : 1624 (C=N); δ<sub>H</sub> (400 MHz, CDCl<sub>3</sub>) 1.84-1.89 (2H, m, CH<sub>2</sub>), 3.50 (4H, t, *J* = 5.7 Hz, 2 × CH<sub>2</sub>), 5.13 (1H, br s, NH), 7.03 (1H, td, *J* = 8.0, 0.9 Hz, Ar), 7.54 (1H, ddd, *J* = 8.0, 6.4, 1.3 Hz, Ar), 7.69 (1H, ddd, *J* = 8.0, 6.5, 1.3 Hz, Ar). δ<sub>C</sub> (100 MHz, CDCl<sub>3</sub>) 20.6, 42.1 (2C), 109.6 (d, *J* = 22.3 Hz), 125.1 (d, *J* = 4.1 Hz), 126.3 (d, *J* = 13.2 Hz), 129.8 (d, *J* = 3.3 Hz), 134.3, 150.8, 156.3 (d, *J* = 248.3 Hz); δ<sub>F</sub> (500 MHz, CDCl<sub>3</sub>) –110.7; *Anal.* calcd for C<sub>10</sub>H<sub>10</sub>BrFN<sub>2</sub>: C, 46.72; H, 3.92; N, 10.90. Found: C, 46.64; H, 4.10; N, 10.93.

**8-Bromo-*N*-(tert-butyl)-3,4-dihydro-2*H*,6*H*-pyrimido[1,2-*c*][1,3]benzothiazin-6-imine (27k).** Using the general procedure as described for **25e**, compound **23k** (257.1 mg, 1.00 mmol) was allowed to react at room temperature overnight. Purification by flash chromatography over aluminum oxide with *n*-hexane–EtOAc (10:0 to 9:1) gave the title compound **27k** as colorless solid (335.3 mg, 95%): mp 89 °C (from *n*-hexane); IR (neat)  $\nu_{\max}/\text{cm}^{-1}$ : 1595 (C=N); δ<sub>H</sub> (500 MHz, CDCl<sub>3</sub>) 1.42 (9H, s, 3 × CH<sub>3</sub>), 1.87-1.92 (2H, m, CH<sub>2</sub>), 3.62 (2H, t, *J* = 5.4 Hz, CH<sub>2</sub>), 3.86 (2H, t, *J* = 6.0 Hz, CH<sub>2</sub>), 7.07 (1H, dd, *J* = 8.0, 7.4 Hz, Ar), 7.55 (1H, d, *J* = 7.4 Hz, Ar), 8.19 (1H, d, *J* = 8.0 Hz, Ar). δ<sub>C</sub> (125 MHz, CDCl<sub>3</sub>) 21.7, 30.1 (3C), 45.3, 45.3, 54.3, 118.6, 126.5, 127.5, 129.9, 130.7, 133.8, 137.4, 147.5; *Anal.* calcd for

C<sub>15</sub>H<sub>18</sub>BrN<sub>3</sub>S: C, 51.14; H, 5.15; N, 11.93. Found: C, 50.89; H, 5.06; N, 11.83.

**8-Bromo-3,4-dihydro-2H,6H-pyrimido[1,2-c][1,3]benzothiazin-6-imine (30k).** Using the general procedure as described for **28a**, compound **27k** (52.8 mg, 0.15 mmol) was allowed to react for 2 h with TFA (1.5 cm<sup>3</sup>) and MS4Å (225 mg). Purification by flash chromatography over silica gel with *n*-hexane–EtOAc (2:1) gave the title compound **30k** as colorless solid (31.6 mg, 71%): mp 138–139 °C (from CHCl<sub>3</sub>–*n*-hexane); IR (neat)  $\nu_{\max}/\text{cm}^{-1}$ : 1567 (C=N);  $\delta_{\text{H}}$  (500 MHz, CDCl<sub>3</sub>) 1.94–1.98 (2H, m, CH<sub>2</sub>), 3.69 (2H, t,  $J = 5.7$  Hz, CH<sub>2</sub>), 4.02 (2H, t,  $J = 6.0$  Hz, CH<sub>2</sub>), 7.10 (1H, dd,  $J = 8.3, 7.7$  Hz, Ar), 7.33 (1H, br s, NH), 7.56 (1H, dd,  $J = 7.7, 1.4$  Hz, Ar), 8.23 (1H, dd,  $J = 8.3, 1.4$  Hz, Ar).  $\delta_{\text{C}}$  (125 MHz, CDCl<sub>3</sub>) 20.8, 43.7, 45.0, 117.6, 126.8, 127.9, 128.8, 130.5, 134.1, 146.2, 152.7; *Anal.* calcd for C<sub>11</sub>H<sub>10</sub>BrN<sub>3</sub>S: C, 44.61; H, 3.40; N, 14.19. Found: C, 44.36; H, 3.64; N, 13.96.

### Synthesis of 3,4-dihydro-2H,6H-pyrimido[1,2-c]naphtho[2,1-e][1,3]thiazine-6-imine (30t)

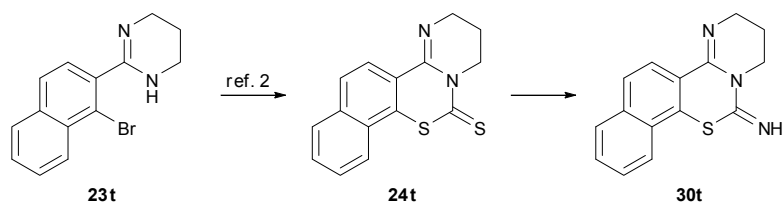

Compound **24t** (71.1 mg, 0.25 mmol) was subjected to general procedure as described for **28f** to give the title compound **30t** as colorless solid (42.3 mg, 63%): mp 157 °C (from CHCl<sub>3</sub>–*n*-hexane); IR (neat)  $\nu_{\max}/\text{cm}^{-1}$ : 1615 (C=N), 1572 (C=N);  $\delta_{\text{H}}$  (500 MHz, CDCl<sub>3</sub>) 1.99–2.03 (2H, m, CH<sub>2</sub>), 3.75 (2H, t,  $J = 5.4$  Hz, CH<sub>2</sub>), 4.07 (2H, t,  $J = 6.0$  Hz, CH<sub>2</sub>), 7.33 (1H, br s, NH), 7.53–7.57 (2H, m, Ar), 7.66 (1H, d,  $J = 8.6$  Hz, Ar), 7.80–7.90 (2H, m, Ar), 8.30 (1H, d,  $J = 9.2$  Hz, Ar).  $\delta_{\text{C}}$  (125 MHz, CDCl<sub>3</sub>) 20.9, 43.7, 45.1, 123.2, 124.0, 125.1, 125.9, 126.7, 126.7, 127.5, 127.8, 128.5, 133.9, 147.1, 152.7; HRMS (FAB):  $m/z$  calcd for C<sub>15</sub>H<sub>14</sub>N<sub>3</sub>S [M + H]<sup>+</sup> 268.0908; found: 268.0906.

### Synthesis of compound 30i

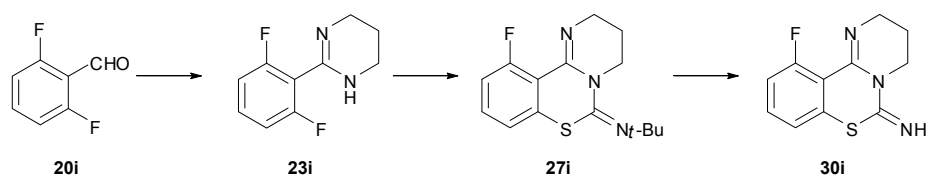

**2-(2,6-Difluorophenyl)-1,4,5,6-tetrahydropyrimidine (23i).** Compound **20i** (1.00 g, 7.04 mmol) was subjected to general procedure as described for **21j** to give the title **23i** as colorless crystals (1.08 g, 78%): mp 165–166 °C (from CHCl<sub>3</sub>–*n*-hexane); IR (neat)  $\nu_{\max}/\text{cm}^{-1}$ : 1620 (C=N);  $\delta_{\text{H}}$  (500 MHz, CDCl<sub>3</sub>) 1.85–1.90 (2H, m, CH<sub>2</sub>), 3.47 (4H, t,  $J = 5.7$  Hz, 2 × CH<sub>2</sub>), 4.77 (1H, br s, NH), 6.86–6.91 (2H, m, Ar), 7.24–7.30 (1H, m, Ar).  $\delta_{\text{C}}$  (100 MHz, CDCl<sub>3</sub>) 20.5, 42.2 (2C), 111.4–111.6 (m, 2C), 115.9 (t,  $J = 20.3$  Hz), 130.1 (t,  $J = 9.9$  Hz), 146.8, 160.3 (dd,  $J = 250.3, 7.0$  Hz, 2C).  $\delta_{\text{F}}$  (500 MHz, CDCl<sub>3</sub>) –114.4; *Anal.* calcd for C<sub>10</sub>H<sub>10</sub>F<sub>2</sub>N<sub>2</sub>: C, 61.22; H, 5.14; N, 14.28. Found: C, 61.23; H, 5.13; N, 14.26.

**N-(tert-Butyl)-11-fluoro-3,4-dihydro-2H,6H-pyrimido[1,2-c][1,3]benzothiazin-6-imine (27i).** Using

the general procedure as described for **25e**, compound **23i** (196.2 mg, 1.0 mmol) was allowed to react at rt overnight. Purification by flash chromatography over aluminum oxide with *n*-hexane–EtOAc (10:0 to 9:1) gave the title compound **27i** as colorless solid (212.6 mg, 73%): mp 81 °C (from *n*-hexane); IR (neat)  $\nu_{\max}/\text{cm}^{-1}$ : 1592 (C=N);  $\delta_{\text{H}}$  (500 MHz,  $\text{CDCl}_3$ ) 1.37 (9H, s, 3 × CH<sub>3</sub>), 1.90-1.95 (2H, m, CH<sub>2</sub>), 3.66 (2H, t,  $J = 5.7$  Hz, CH<sub>2</sub>), 3.80 (2H, t,  $J = 6.6$  Hz, CH<sub>2</sub>), 6.94-6.99 (2H, m, Ar), 7.23-7.26 (1H, m, Ar).  $\delta_{\text{C}}$  (125 MHz,  $\text{CDCl}_3$ ) 22.5, 30.1 (3C), 45.3, 45.5, 54.2, 115.0 (d,  $J = 24.0$  Hz), 118.7, 120.9 (d,  $J = 3.6$  Hz), 130.6 (d,  $J = 10.8$  Hz), 131.9, 137.6, 146.1 (d,  $J = 8.4$  Hz), 160.2 (d,  $J = 260.3$  Hz);  $\delta_{\text{F}}$  (500 MHz,  $\text{CDCl}_3$ ) –110.8. HRMS (FAB):  $m/z$  calcd for C<sub>15</sub>H<sub>19</sub>FN<sub>3</sub>S [M + H]<sup>+</sup> 292.1284; found: 292.1288.

**11-Fluoro-3,4-dihydro-2H,6H-pyrimido[1,2-*c*][1,3]benzothiazin-6-imine (30i).** Using the general procedure as described for **28a**, compound **27i** (58.3 mg, 0.20 mmol) was allowed to react for 1 h. Purification by flash chromatography over aluminum oxide with *n*-hexane–EtOAc (9:1) gave the title compound **30i** as colorless solid (42.3 mg, 90%): mp 142.5 °C (from  $\text{CHCl}_3$ –*n*-hexane); IR (neat)  $\nu_{\max}/\text{cm}^{-1}$ : 1624 (C=N), 1585 (C=N);  $\delta_{\text{H}}$  (500 MHz,  $\text{CDCl}_3$ ) 1.97-2.02 (2H, m, CH<sub>2</sub>), 3.73 (2H, t,  $J = 5.2$  Hz, CH<sub>2</sub>), 3.94 (2H, t,  $J = 6.6$  Hz, CH<sub>2</sub>), 6.91 (1H, d,  $J = 8.0$  Hz, Ar), 6.97-7.01 (1H, m, Ar), 7.22 (1H, br s, NH), 7.27-7.31 (1H, m, Ar).  $\delta_{\text{C}}$  (125 MHz,  $\text{CDCl}_3$ ) 21.7, 44.0, 45.5, 115.3 (d,  $J = 24.0$  Hz), 117.4 (d,  $J = 8.4$  Hz), 120.0 (d,  $J = 3.6$  Hz), 131.2 (d,  $J = 9.6$  Hz), 131.5, 144.8 (d,  $J = 9.6$  Hz), 152.6 (d,  $J = 4.8$  Hz), 160.5 (d,  $J = 261.5$  Hz)  $\delta_{\text{F}}$  (500 MHz,  $\text{CDCl}_3$ ) –110.0. *Anal.* calcd for C<sub>11</sub>H<sub>10</sub>FN<sub>3</sub>S: C, 56.15; H, 4.28; N, 17.86. Found: C, 56.05; H, 4.28; N, 17.71.

### Synthesis of compound 30u

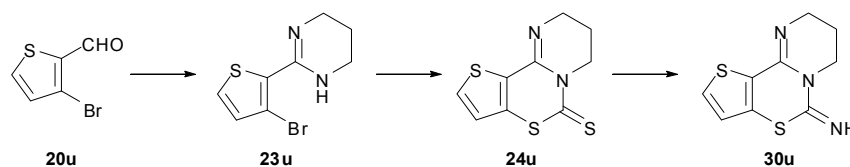

**2-(3-Bromothiophen-2-yl)-1,4,5,6-tetrahydropyrimidine (23u).** Compound **20u** (1.29 g, 6.75 mmol) was subjected to general procedure as described for **21j** to give the title compound **23u** as pale yellow crystals (1.11 g, 67%): mp 61–63 °C (from  $\text{CHCl}_3$ –*n*-hexane); IR (neat)  $\nu_{\max}/\text{cm}^{-1}$ : 1611 (C=N);  $\delta_{\text{H}}$  (400 MHz,  $\text{CDCl}_3$ ) 1.83-1.88 (2H, m, CH<sub>2</sub>), 3.48 (4H, t,  $J = 5.9$  Hz, 2 × CH<sub>2</sub>), 6.07 (1H, br s, NH), 6.92 (1H, d,  $J = 5.4$  Hz, Ar), 7.24 (1H, d,  $J = 5.4$  Hz, Ar).  $\delta_{\text{C}}$  (100 MHz,  $\text{CDCl}_3$ ) 20.5, 42.0 (2C), 105.8, 127.3, 131.4, 135.6, 149.3; HRMS (FAB):  $m/z$  calcd for C<sub>8</sub>H<sub>10</sub>BrN<sub>2</sub>S [M + H]<sup>+</sup> 244.9748; found: 244.9742.

**3,4-Dihydro-2H,6H-pyrimido[1,2-*c*]thieno[2,3-*e*][1,3]thiazin-6-thione (24u).** To a mixture of **23u** (122.6 mg, 0.50 mmol) and NaH (40.0 mg, 1.0 mmol; 60% oil suspension) in DMF (1.7 cm<sup>3</sup>) was added carbon disulfide (0.060 cm<sup>3</sup>, 1.0 mmol) under an Ar atmosphere. After being stirred at 80 °C for 12 h, the mixture was concentrated. The residue was purified by flash chromatography over silica gel with *n*-hexane–EtOAc (8:2) to give the title compound **24u** as pale yellow solid (80.5 mg, 67%): mp 167 °C (from  $\text{CHCl}_3$ –*n*-hexane); IR (neat)  $\nu_{\max}/\text{cm}^{-1}$ : 1624 (C=N);  $\delta_{\text{H}}$  (400 MHz,  $\text{CDCl}_3$ ) 2.04-2.10 (2H, m, CH<sub>2</sub>), 3.68 (2H, t,  $J = 5.5$  Hz, CH<sub>2</sub>), 4.42 (2H, t,  $J = 6.1$  Hz, CH<sub>2</sub>), 6.76 (1H, d,  $J = 5.4$  Hz, Ar), 7.49 (1H, d,  $J = 5.4$  Hz, Ar).  $\delta_{\text{C}}$  (100 MHz,  $\text{CDCl}_3$ ) 21.5, 45.0, 48.5, 122.3, 128.4, 130.8, 131.0, 141.7, 189.7; HRMS



(FAB):  $m/z$  calcd for  $C_9H_9N_2S_3 [M + H]^+$  240.9928; found: 240.9936.

**3,4-Dihydro-2*H*,6*H*-pyrimido[1,2-*c*][thieno[2,3-*e*][1,3]thiazin-6-imine (30u).** Compound **24u** (60.1 mg, 0.25 mmol) was subjected to general procedure as described for **28f** to give the title compound **30u** as colorless solid (19.4 mg, 35%): mp 100–101 °C (from  $CHCl_3$ –*n*-hexane); IR (neat)  $\nu_{max}/cm^{-1}$ : 1616 (C=N), 1567 (C=N);  $\delta_H$  (400 MHz,  $CDCl_3$ ) 1.99–2.05 (2H, m,  $CH_2$ ), 3.62 (2H, t,  $J = 5.6$  Hz,  $CH_2$ ), 3.99 (2H, t,  $J = 6.1$  Hz,  $CH_2$ ), 6.74 (1H, d,  $J = 5.4$  Hz, Ar), 7.28 (1H, br s, NH), 7.41 (1H, d,  $J = 5.4$  Hz, Ar).  $\delta_C$  (100 MHz,  $CDCl_3$ ) 21.2, 43.5, 44.5, 123.3, 125.9, 127.0, 129.9, 143.7, 153.7; *Anal.* calcd for  $C_9H_9N_3S_2$ : C, 48.40; H, 4.06; N, 18.82. Found: C, 48.38; H, 3.98; N, 18.75.

### Synthesis of 2,3-dihydro-5*H*-imidazo[1,2-*c*][1,3]benzothiazin-5-imine (359a)

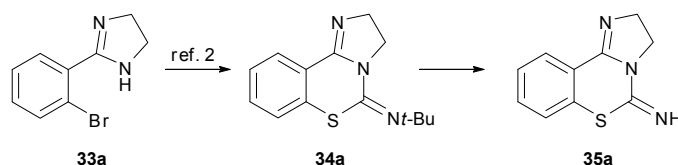

Using the general procedure as described for **27a**, compound **34a** (18.4 mg, 0.07 mmol) was allowed to react for 12 h with TFA (1.0  $cm^3$ ) and MS4Å (150 mg). Purification by flash chromatography over silica gel with *n*-hexane–EtOAc (1:1) gave the title compound **35a** as colorless solid (11.1 mg, 78%): mp 176–178 °C (from  $CHCl_3$ –*n*-hexane); IR (neat)  $\nu_{max}/cm^{-1}$ : 1621 (C=N), 1585 (C=N);  $\delta_H$  (500 MHz,  $CDCl_3$ ) 4.11 (4H, s,  $2 \times CH_2$ ), 5.82 (1H, br s, NH), 7.12 (1H, d,  $J = 8.0$  Hz, Ar), 7.24–7.28 (1H, m, Ar), 7.38–7.42 (1H, m, Ar), 8.20 (1H, dd,  $J = 7.7, 1.4$  Hz, Ar).  $\delta_C$  (125 MHz,  $CDCl_3$ ) 47.3, 52.9, 120.8, 123.8, 126.5, 129.1, 132.0, 132.4, 150.0, 154.0; HRMS (FAB):  $m/z$  calcd for  $C_{10}H_{10}N_3S [M + H]^+$  204.0595; found: 204.0600.

### Synthesis of compound 35b

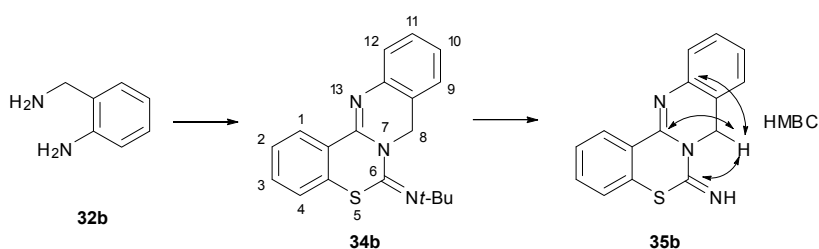

***N*-(*tert*-Butyl)-6*H*,8*H*-quinazolino[3,2-*c*][1,3]benzothiazin-6-imine (34b).** To a solution of 2-fluorobenzaldehyde (1.41 g, 11.39 mmol) in *t*-BuOH (38  $cm^3$ ) was added 2-aminobenzylamine **32b** (1.53 g, 12.53 mmol). The mixture was stirred at 80 °C for 30 min, and then  $K_2CO_3$  (4.73 g, 34.18 mmol) and  $I_2$  (3.61 g, 14.24 mmol) were added. After being stirred at same temperature for 4 h, the mixture was quenched with sat.  $Na_2SO_3$ . The organic layer was separated and concentrated. The resulting solid was dissolved with  $H_2O$  and  $CHCl_3$ , and then pH was adjusted to 12–14 with 5*N* NaOH. The whole was extracted with  $CHCl_3$ . The extract was washed with brine, dried over  $Na_2SO_4$ . To a mixture of resulting residue in DMAc (7.4  $cm^3$ ) was added  $KOt$ -Bu (496 mg, 4.42 mmol) and *tert*-butylisothiocyanate (0.56  $cm^3$ , 4.42 mmol) under an  $N_2$  atmosphere. After being stirred at 80 °C for 2.5 h, sat.  $NH_4Cl$  was added.

The whole was extracted with EtOAc. The extract was washed with brine, and dried over Na<sub>2</sub>SO<sub>4</sub>. After concentration, the residue was purified by flash chromatography over silica gel with *n*-hexane–EtOAc (10:0 to 9:1) to give the title compound **34b** as yellow solid (114.1 mg, 3.1% over 2 steps): mp 92.2 °C; IR (neat)  $\nu_{\max}/\text{cm}^{-1}$ : 1588 (C=N);  $\delta_{\text{H}}$  (300 MHz, CDCl<sub>3</sub>) 1.42 (9H, s, 3 × CH<sub>3</sub>), 5.10 (2H, s, CH<sub>2</sub>), 7.08–7.23 (3H, m, Ar), 7.27–7.40 (4H, m, Ar), 8.43 (1H, dd,  $J = 8.0, 1.4$  Hz, Ar).  $\delta_{\text{C}}$  (75 MHz, CDCl<sub>3</sub>) 29.9 (3C), 46.2, 54.7, 124.0, 124.8, 124.9, 125.4, 125.8, 126.4, 127.7, 128.3, 129.0, 129.4, 130.7, 138.3, 141.1, 148.3; *Anal.* calcd for C<sub>19</sub>H<sub>19</sub>N<sub>3</sub>S: C, 70.99; H, 5.96; N, 13.07. Found: C, 71.05; H, 5.99; N, 12.91.

**6H,8H-Quinazolino[3,2-*c*][1,3]benzothiazin-6-imine (35b).** TFA (0.5 cm<sup>3</sup>) was added to **34b** (100 mg, 0.311 mmol). After being stirred under reflux for 30 min, the mixture was added dropwise to Et<sub>3</sub>N at 0 °C to adjust pH to 8–9. The whole was extracted with EtOAc. The extract was washed with sat. NaHCO<sub>3</sub> aq., brine, and dried over Na<sub>2</sub>SO<sub>4</sub>. After concentration, the residue was purified by preparative TLC over aluminium oxide with *n*-hexane–EtOAc (9:1) to give the title compound **35b** as colorless crystals (13 mg, 16%): Colorless solid (42.1 mg, 87%): mp 133–135 °C (from CHCl<sub>3</sub>–*n*-hexane); IR (neat)  $\nu_{\max}/\text{cm}^{-1}$ : 1594 (C=N), 1541 (C=N);  $\delta_{\text{H}}$  (500 MHz, CDCl<sub>3</sub>) 5.27 (2H, s, CH<sub>2</sub>), 7.08–7.13 (2H, m, Ar), 7.16 (1H, t,  $J = 7.2$  Hz, Ar), 7.26–7.34 (3H, m, Ar), 7.39 (1H, td,  $J = 6.9, 1.1$  Hz, Ar), 7.59 (1H, br s, NH), 8.50 (1H, d,  $J = 8.0$  Hz, Ar).  $\delta_{\text{C}}$  (125 MHz, CDCl<sub>3</sub>) 45.1, 123.0, 123.8, 125.4, 125.6, 126.3, 126.5, 126.6, 128.5, 129.2, 129.5, 131.1, 140.1, 146.3, 153.3; HRMS (FAB):  $m/z$  calcd for C<sub>15</sub>H<sub>12</sub>N<sub>3</sub>S [M + H]<sup>+</sup> 266.0752; found: 266.0750.

### Synthesis of compound 35c

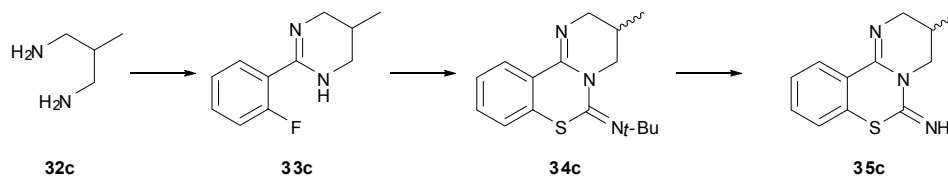

**2-(2-Fluorophenyl)-5-methyl-1,4,5,6-tetrahydropyrimidine (33c).** 2-Fluorobenzaldehyde (0.62 g, 5.0 mmol) was subjected to general procedure for **21j** using 2-methylpropylenediamine **32c** (0.48 g, 5.5 mmol) to give the title compound **33c** as colorless crystals (0.72 g, 75%): mp 98–99 °C (from CHCl<sub>3</sub>–*n*-hexane); IR (neat)  $\nu_{\max}/\text{cm}^{-1}$ : 1628 (C=N);  $\delta_{\text{H}}$  (500 MHz, CDCl<sub>3</sub>) 1.01 (3H, d,  $J = 6.9$  Hz, CH<sub>3</sub>), 1.92–1.99 (1H, m, CH), 3.06 (2H, dd,  $J = 13.2, 9.7$  Hz, 2 × CH), 3.52 (2H, dd,  $J = 13.2, 3.4$  Hz, 2 × CH), 5.27 (1H, br s, NH), 7.04 (1H, dd,  $J = 11.7, 8.3$  Hz, Ar), 7.15 (1H, t,  $J = 7.4$  Hz, Ar), 7.30–7.35 (1H, m, Ar), 7.81 (1H, td,  $J = 7.4, 1.7$  Hz, Ar).  $\delta_{\text{C}}$  (125 MHz, CDCl<sub>3</sub>) 16.8, 25.2, 49.4 (2C), 115.9 (d,  $J = 24.0$  Hz), 124.2, 124.3 (d,  $J = 3.6$  Hz), 130.6 (d,  $J = 3.6$  Hz), 130.8 (d,  $J = 8.4$  Hz), 151.3, 160.1 (d,  $J = 247.1$  Hz);  $\delta_{\text{F}}$  (500 MHz, CDCl<sub>3</sub>) –117.1. HRMS (FAB):  $m/z$  calcd for C<sub>11</sub>H<sub>14</sub>FN<sub>2</sub> [M + H]<sup>+</sup> 193.1141; found: 193.1136.

**(±)-*N*-(*tert*-Butyl)-3,4-dihydro-3-methyl-2*H*,6*H*-pyrimido[1,2-*c*][1,3]benzothiazin-6-imine (34c).** Using the general procedure as described for **25e**, compound **33c** (384.5 mg, 2.0 mmol) was allowed to react at 80 °C for 2 h. Purification by flash chromatography over aluminum oxide with *n*-hexane–EtOAc (10:0 to 95:5) gave the title compound **34c** as colorless solid (288.4 mg, 50%): mp 60–62 °C (from

*n*-hexane); IR (neat)  $\nu_{\max}/\text{cm}^{-1}$ : 1598 (C=N), 1570 (C=N);  $\delta_{\text{H}}$  (500 MHz,  $\text{CDCl}_3$ ) 1.05 (3H, d,  $J = 6.3$  Hz,  $\text{CH}_3$ ), 1.39 (9H, s,  $3 \times \text{CH}_3$ ), 1.91-1.99 (1H, m, CH), 3.09-3.17 (2H, m,  $\text{CH}_2$ ), 3.72 (1H, dt,  $J = 15.5, 3.7$  Hz, CH), 4.19 (1H, dt,  $J = 13.7, 3.7$  Hz, CH), 7.11 (1H, d,  $J = 8.0$  Hz, Ar), 7.19 (1H, t,  $J = 8.0$  Hz, Ar), 7.30 (1H, t,  $J = 8.0$  Hz, Ar), 8.19 (1H, d,  $J = 8.0$  Hz, Ar).  $\delta_{\text{C}}$  (125 MHz,  $\text{CDCl}_3$ ) 16.7, 26.9, 30.0 (3C), 51.6, 52.4, 54.2, 124.4, 126.0, 127.7, 128.5, 129.1, 130.1, 138.4, 147.6; HRMS (FAB):  $m/z$  calcd for  $\text{C}_{16}\text{H}_{22}\text{N}_3\text{S} [\text{M} + \text{H}]^+$  288.1534; found: 288.1535.

**(±)-3,4-Dihydro-3-methyl-2H,6H-pyrimido[1,2-*c*][1,3]benzothiazin-6-imine (35c).** Using the general procedure as described for **28a**, compound **34c** (57.5 mg, 0.20 mmol) was allowed to react for 1 h. Purification by flash chromatography over aluminum oxide with *n*-hexane–EtOAc (9:1) gave the title compound **35c** as colorless solid (36.7 mg, 79%): mp 82–84 °C (from  $\text{CHCl}_3$ –*n*-hexane); IR (neat)  $\nu_{\max}/\text{cm}^{-1}$ : 1621 (C=N), 1574 (C=N);  $\delta_{\text{H}}$  (500 MHz,  $\text{CDCl}_3$ ) 1.09 (3H, d,  $J = 6.3$  Hz,  $\text{CH}_3$ ), 1.96-2.08 (1H, m, CH), 3.19 (1H, dd,  $J = 15.8, 10.6$  Hz, CH), 3.27 (1H, dd,  $J = 13.0, 10.6$  Hz, CH), 3.80 (1H, ddd,  $J = 15.8, 4.5, 3.2$  Hz, CH), 4.37 (1H, ddd,  $J = 13.0, 4.5, 3.2$  Hz, CH), 7.04 (1H, d,  $J = 7.4$  Hz, Ar), 7.18-7.25 (2H, m, Ar, NH), 7.33 (1H, td,  $J = 7.4, 1.4$  Hz, Ar), 8.23 (1H, dd,  $J = 8.3, 1.4$  Hz, Ar).  $\delta_{\text{C}}$  (125 MHz,  $\text{CDCl}_3$ ) 16.4, 26.1, 49.9, 52.2, 123.5, 126.3, 126.6, 128.8, 128.9, 130.6, 146.2, 153.4; *Anal.* calcd for  $\text{C}_{12}\text{H}_{13}\text{N}_3\text{S}$ : C, 62.31; H, 5.66; N, 18.17. Found: C, 62.04; H, 5.75; N, 17.88.

### Synthesis of compound 35d

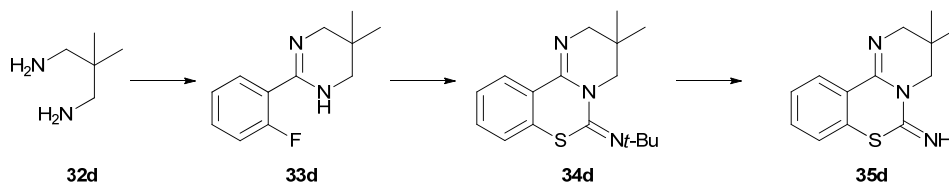

**2-(2-Fluorophenyl)-5,5-dimethyl-1,4,5,6-tetrahydropyrimidine (33d).** 2-Fluorobenzaldehyde (0.62 g, 5.0 mmol) was subjected to general procedure for **21j** using 2,2-dimethylpropylenediamine **32d** (0.56 g, 5.5 mmol) to give the title compound **33d** as colorless crystals (0.82 g, 79%): mp 150–153 °C (from  $\text{CHCl}_3$ –*n*-hexane); IR (neat)  $\nu_{\max}/\text{cm}^{-1}$ : 1629 (C=N);  $\delta_{\text{H}}$  (400 MHz,  $\text{CDCl}_3$ ) 1.02 (6H, s,  $2 \times \text{CH}_3$ ), 3.13 (4H, s,  $2 \times \text{CH}_2$ ), 5.14 (1H, br s, NH), 7.05 (1H, ddd,  $J = 11.7, 7.8, 1.0$  Hz, Ar), 7.15 (1H, td,  $J = 7.8, 1.0$  Hz, Ar), 7.30-7.35 (1H, m, Ar), 7.81 (1H, td,  $J = 7.8, 2.0$  Hz, Ar).  $\delta_{\text{C}}$  (100 MHz,  $\text{CDCl}_3$ ) 25.0 (2C), 26.2, 54.3 (2C), 115.8 (d,  $J = 23.2$  Hz), 124.2, 124.3 (d,  $J = 3.3$  Hz), 130.6 (d,  $J = 4.1$  Hz), 130.8 (d,  $J = 9.1$  Hz), 150.5 (d,  $J = 1.7$  Hz), 160.2 (d,  $J = 247.5$  Hz);  $\delta_{\text{F}}$  (500 MHz,  $\text{CDCl}_3$ ) –117.3. HRMS (FAB):  $m/z$  calcd for  $\text{C}_{12}\text{H}_{16}\text{FN}_2 [\text{M} + \text{H}]^+$  207.1298; found: 207.1299.

**N-(tert-Butyl)-3,4-dihydro-3,3-dimethyl-2H,6H-pyrimido[1,2-*c*][1,3]benzothiazin-6-imine (34d).** Using the general procedure as described for **25e**, compound **33d** (412.5 mg, 2.0 mmol) was allowed to react at 80 °C for 2 h. Purification by flash chromatography over aluminum oxide with *n*-hexane–EtOAc (10:0 to 9:1) gave the title compound **34d** as colorless solid (236.6 mg, 39%): mp 70–72 °C (from *n*-hexane); IR (neat)  $\nu_{\max}/\text{cm}^{-1}$ : 1602 (C=N), 1570 (C=N);  $\delta_{\text{H}}$  (500 MHz,  $\text{CDCl}_3$ ) 1.01 (6H, s,  $2 \times \text{CH}_3$ ), 1.39 (9H, s,  $3 \times \text{CH}_3$ ), 3.33 (2H, s,  $\text{CH}_2$ ), 3.58 (2H, s,  $\text{CH}_2$ ), 7.12 (1H, d,  $J = 8.0$  Hz, Ar), 7.20 (1H, t,  $J = 8.0$  Hz, Ar), 7.31 (1H, td,  $J = 8.0, 1.1$  Hz, Ar), 8.21 (1H, dd,  $J = 8.0, 1.1$  Hz, Ar).  $\delta_{\text{C}}$  (125 MHz,  $\text{CDCl}_3$ )

24.8 (2C), 28.5, 29.9 (3C), 54.2, 55.7, 57.4, 124.5, 126.0, 127.5, 128.5, 129.1, 130.1, 138.7, 146.7; HRMS (FAB):  $m/z$  calcd for  $C_{17}H_{24}N_3S$   $[M + H]^+$  302.1691; found: 302.1695.

**3,4-Dihydro-3,3-dimethyl-2H,6H-pyrimido[1,2-c][1,3]benzothiazin-6-imine (35d).** Using the general procedure as described for **28a**, compound **34d** (60.3 mg, 0.20 mmol) was allowed to react for 1 h. Purification by flash chromatography over aluminum oxide with *n*-hexane–EtOAc (9:1) gave the title compound **35d** as colorless solid (42.0 mg, 86%): mp 113–114 °C (from  $CHCl_3$ –*n*-hexane); IR (neat)  $\nu_{max}/cm^{-1}$ : 1627 (C=N), 1575 (C=N);  $\delta_H$  (500 MHz,  $CDCl_3$ ) 1.05 (6H, s,  $2 \times CH_3$ ), 3.41 (2H, s,  $CH_2$ ), 3.74 (2H, s,  $CH_2$ ), 7.05 (1H, dd,  $J = 7.6, 1.1$  Hz, Ar), 7.21–7.25 (2H, m, Ar, NH), 7.34 (1H, td,  $J = 7.6, 1.4$  Hz, Ar), 8.26 (1H, dd,  $J = 8.3, 1.4$  Hz, Ar);  $\delta_C$  (125 MHz,  $CDCl_3$ ) 24.6 (2C), 27.9, 54.0, 57.2, 123.5, 126.3, 126.3, 128.8, 128.9, 130.6, 145.3, 153.8; HRMS (FAB):  $m/z$  calcd for  $C_{13}H_{16}N_3S$   $[M + H]^+$  246.1065; found: 246.1069.

### Synthesis of compound 35e

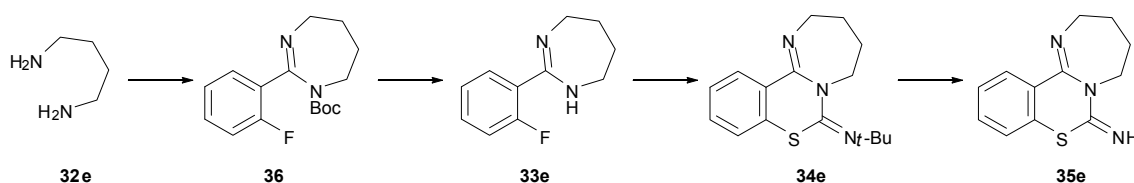

***N*-(*tert*-Butoxycarbonyl)-2-(2-fluorophenyl)-4,5,6,7-tetrahydro-1,3-diazepine (36).** To a solution of 2-fluorobenzaldehyde (2.48 g, 20.0 mmol) in *t*-BuOH (188  $cm^3$ ) was added 1,4-diaminobutane **32e** (2.21  $cm^3$ , 22.0 mmol). The mixture was stirred at 70 °C for 30 min, and then  $K_2CO_3$  (8.29 g, 60.0 mmol) and  $I_2$  (6.35 g, 25 mmol) were added. After being stirred at same temperature for 3 h, the mixture was quenched with sat.  $Na_2SO_3$ . The organic layer was separated and concentrated. The resulting solid was dissolved with  $H_2O$ , and then pH was adjusted to 12–14 with 2N NaOH. The whole was extracted with  $CHCl_3$ , and dried over  $Na_2SO_4$ . After concentration,  $Et_3N$  (8.67  $cm^3$ , 60.0 mmol) and  $Boc_2O$  (13.8  $cm^3$ , 60.0 mmol) were added to the solution of residue in  $CH_2Cl_2$  (100  $cm^3$ ). After being stirred for 30 min at rt, sat.  $NaHCO_3$  was added. After being stirred at rt for 1 h, the whole was extracted with  $CHCl_3$ . The extract was washed with brine, and dried over  $MgSO_4$ . After concentration, the residue was purified by column chromatography over silica gel with *n*-hexane–EtOAc (4:1) to give the title compound **36** as colorless solid (2.18 g, 37%): mp 63–65 °C (from *n*-hexane); IR (neat)  $\nu_{max}/cm^{-1}$ : 1710 (C=O), 1631 (C=N);  $\delta_H$  (500 MHz,  $CDCl_3$ ) 1.14 (9H, s,  $3 \times CH_3$ ), 1.66–1.70 (2H, m,  $CH_2$ ), 1.78–1.83 (2H, m,  $CH_2$ ), 3.61 (2H, br s,  $CH_2$ ), 3.76 (2H, t,  $J = 5.2$  Hz,  $CH_2$ ), 7.03 (1H, dd,  $J = 11.2, 8.3$  Hz, Ar), 7.15 (1H, td,  $J = 7.7, 1.1$  Hz, Ar), 7.33–7.38 (1H, m, Ar), 7.60 (1H, t,  $J = 7.7$  Hz, Ar).  $\delta_C$  (125 MHz,  $CDCl_3$ ) 23.2, 26.4, 27.7 (3C), 44.9, 50.7, 81.1, 115.7 (d,  $J = 21.6$  Hz), 124.0 (d,  $J = 2.4$  Hz), 126.5, 130.9 (d,  $J = 2.4$  Hz), 131.1 (d,  $J = 8.4$  Hz), 152.8, 154.8, 160.5 (d,  $J = 250.7$  Hz).  $\delta_F$  (500 MHz,  $CDCl_3$ ) –118.9; HRMS (FAB)  $m/z$  calcd for  $C_{16}H_{22}FN_2O_2$   $[M + H]^+$  293.1665; found: 293.1669.

**2-(2-Fluorophenyl)-4,5,6,7-tetrahydro-1H-1,3-diazepine (33e).** To a solution of **36** (877.1 mg, 3.0 mmol) in  $CH_2Cl_2$  (6.0  $cm^3$ ) was added TFA (6.0  $cm^3$ ). The mixture was stirred under reflux for 2 h, mixture was washed with 2N NaOH. The organic phase was dried over  $MgSO_4$ . After concentration, the

residue was recrystallized from  $\text{CHCl}_3$ -*n*-hexane to give the title compound **33e** as colorless crystals (461.2 mg, 80%): mp 92 °C; IR (neat)  $\nu_{\text{max}}/\text{cm}^{-1}$ : 1627 (C=N);  $\delta_{\text{H}}$  (500 MHz,  $\text{CDCl}_3$ ) 1.80-1.83 (4H, m, 2 ×  $\text{CH}_2$ ), 3.48 (4H, br s, 2 ×  $\text{CH}_2$ ), 4.86 (1H, br s, NH), 7.02-7.06 (1H, m, Ar), 7.12 (1H, td,  $J = 7.7, 1.1$  Hz, Ar), 7.30-7.34 (1H, m, Ar), 7.63 (1H, td,  $J = 7.7, 1.7$  Hz, Ar).  $\delta_{\text{C}}$  (125 MHz,  $\text{CDCl}_3$ ) 28.4 (2C), 47.9 (2C), 115.7 (d,  $J = 22.8$  Hz), 124.2 (d,  $J = 3.6$  Hz), 127.0 (d,  $J = 12.0$  Hz), 130.9 (d,  $J = 8.4$  Hz), 131.2 (d,  $J = 3.6$  Hz), 157.2, 160.4 (d,  $J = 247.1$  Hz).  $\delta_{\text{F}}$  (500 MHz,  $\text{CDCl}_3$ ) -117.7; HRMS (FAB)  $m/z$  calcd for  $\text{C}_{11}\text{H}_{14}\text{FN}_2$  [ $\text{M} + \text{H}$ ]<sup>+</sup> 193.1141; found: 193.1140.

***N*-(*tert*-Butyl)-7*H*-2,3,4,5-tetrahydro-1,3-diazepino[1,2-*c*][1,3]benzothiazin-7-imine (34e).** Using the general procedure as described for **25e**, compound **33e** (192.2 mg, 1.0 mmol) was allowed to react at rt overnight. Purification by flash chromatography over silica gel with *n*-hexane–EtOAc (4:1) gave the title compound **34e** as a yellow oil (50.3 mg, 18%): IR (neat)  $\nu_{\text{max}}/\text{cm}^{-1}$ : 1588 (C=N);  $\delta_{\text{H}}$  (400 MHz,  $\text{CDCl}_3$ ) 1.37 (9H, s, 3 ×  $\text{CH}_3$ ), 1.87-1.93 (4H, m, 2 ×  $\text{CH}_2$ ), 3.82 (2H, t,  $J = 5.4$  Hz,  $\text{CH}_2$ ), 3.88 (2H, t,  $J = 5.4$  Hz,  $\text{CH}_2$ ), 7.16-7.23 (2H, m, Ar), 7.26-7.31 (1H, m, Ar), 7.84 (1H, d,  $J = 7.1$  Hz, Ar).  $\delta_{\text{C}}$  (100 MHz,  $\text{CDCl}_3$ ) 23.3, 24.5, 30.2 (3C), 48.3, 49.2, 53.8, 124.9, 126.3, 127.0, 129.4, 129.7, 133.5, 140.0, 152.2; HRMS (FAB)  $m/z$  calcd for  $\text{C}_{16}\text{H}_{22}\text{N}_3\text{S}$  [ $\text{M} + \text{H}$ ]<sup>+</sup> 288.1534; found: 288.1540.

**2,3,4,5-Tetrahydro-7*H*-1,3-diazepino[1,2-*c*][1,3]benzothiazin-7-imine (35e).** Using the general procedure as described for **28a**, compound **34e** (50.3 mg, 0.18 mmol) was allowed to react for 2 h. Purification by flash chromatography over aluminum oxide with *n*-hexane–EtOAc (4:1 to 2:1) gave the title compound **35e** as a colorless oil (11.3 mg, 27%): IR (neat)  $\nu_{\text{max}}/\text{cm}^{-1}$ : 1638 (C=N), 1578 (C=N);  $\delta_{\text{H}}$  (400 MHz,  $\text{CDCl}_3$ ) 1.94-2.01 (4H, m, 2 ×  $\text{CH}_2$ ), 3.92 (2H, t,  $J = 5.5$  Hz,  $\text{CH}_2$ ), 3.96 (2H, t,  $J = 5.6$  Hz,  $\text{CH}_2$ ), 7.00 (1H, br s, NH), 7.12-7.14 (1H, m, Ar), 7.23-7.28 (1H, m, Ar), 7.31-7.35 (1H, m, Ar), 7.90 (1H, dd,  $J = 7.8, 1.5$  Hz, Ar).  $\delta_{\text{C}}$  (125 MHz,  $\text{CDCl}_3$ ) 23.3, 24.3, 47.5, 49.0, 124.2, 126.6, 127.5, 129.3, 129.9, 132.0, 151.0, 155.5; HRMS (FAB)  $m/z$  calcd for  $\text{C}_{12}\text{H}_{14}\text{N}_3\text{S}$  [ $\text{M} + \text{H}$ ]<sup>+</sup> 232.0908; found: 232.0906.

<sup>1</sup>H and <sup>13</sup>C NMR spectra of

3,4-dihydro-2*H*,6*H*-pyrimido[1,2-*c*][1,3]benzothiazin-6-imine (**4**, Scheme 2)<sup>2</sup>,

3,4-dihydro-2*H*,6*H*-pyrimido[1,2-*c*][1,3]benzoxazin-6-one (**7**, Scheme 2)<sup>1</sup>,

3,4-dihydro-2*H*,6*H*-pyrimido[1,2-*c*]quinazolin-6(7*H*)-one (**10**, Scheme 2)<sup>1</sup>,

2-phenyl-1,4,5,6-tetrahydropyrimidine derivatives (**21e-g**, **21i**, **22e**, **23s** and **23t**, Scheme 4)<sup>2</sup>,

3,4-dihydro-2*H*,6*H*-pyrimido[1,2-*c*][1,3]benzthiazine-6-thione derivatives (**24f**, **24g**, **24i**, **24s** and **24t**, Scheme 4)<sup>2</sup>,

2-(2-bromophenyl)-4,5-dihydro-1*H*-imidazole (**33a**)<sup>2</sup>, and

*N*-*tert*-butyl-2,3-dihydroimidazo[1,2-*c*][1,3]benzothiazin-5-imine (**34a**)<sup>2</sup>

were in good agreement with those previously reported.

## References

- (1) T. Mizuhara, S. Inuki, S. Oishi, N. Fujii, H. Ohno, *Chem Commun.* 2009, 3413–3415.
- (2) T. Mizuhara, S. Oishi, N. Fujii, H. Ohno, *J. Org. Chem.* 2010, **75**, 265–268.
